# Supplementary material for: Linaridin natural products
Source: Royal Society of Chemistry journal article supplement (doi:10.1039/c9np00074g), 2020-01-01
Supplement: c9np00074g1.xlsx [file c9np00074g1.xlsx]

## Sheet: Key
Linaridin Genetic Landscape
This dataset showcases linaridins (303 precursor peptide out of 204 gene clusters) identified by RODEO [1] in January 2019
The following sheets are included:
Type A linaridin: recording type A1 and type A2 linaridins
Type B linaridin: recording type B linaridins
Type C linaridin: recording type C1 and type C2 linaridins
Linaridin modification analysis: documenting modification index analysis and amino acid composition analysis
Note:
This dataset is published as an update to our previous study [2]
Reference:
[1]. J. I. Tietz, C. J. Schwalen, P. S. Patel, T. Maxson, P. M. Blair, H. C. Tai, U. I. Zakai and D. A. Mitchell, Nat Chem Biol, 2017, 13, 470-478.
[2]. T. Mo, W. Q. Liu, W. Ji, J. Zhao, T. Chen, W. Ding, S. Yu and Q. Zhang, ACS Chem Biol, 2017, 12, 1484-1488.

## Sheet: Type A linaridin
Producing Organism	LinL	Type	LinA Candidate	LinA Cleavage-site	LinA Core	Core Length	Ser in Core	Thr in Core	Cys in Core
Auritidibacter sp. NML130574	WP_110111037.1	A1	MSIEIDIVQQFANETFKEATPGFVTAAETPAMATPGVTPATPHAAQYVVQGSTICLIC	PAMATP	ATPGVTPATPHAAQYVVQGSTICLIC	26	1	4	2
Brevibacterium aurantiacum.	SMX73782.1	A1	MDTEVMDVQNFANSAMGSAEAGLKTDASAPAMTTPTAVQFVIQGSTICLIC	PAMTTP	TTPTAVQFVIQGSTICLIC	19	1	4	2
Brevibacterium sp. 239c.	SMY04513.1	A1	MDTEVMDVQNFANSAMGSAEAGLKADASAPAMTTPTAVQFVIQGSTICLIC	PAMTTP	TTPTAVQFVIQGSTICLIC	19	1	4	2
Curtobacterium sp. MCBD17_013.	PZF62989.1	A1	MNSEVLEVQAFANTALSSAEAGARADASIPAMTTPTIVAAAEFVVAGSTICLIC	PAMTTP	TTPTIVAAAEFVVAGSTICLIC	22	1	4	2
Curtobacterium sp. MCBD17_035.	PZF32190.1	A1	MNSEVLEVQAFANTALSSAEAGARADASIPAMTTPTIVAAAEFVVAGSTICLIC	PAMTTP	TTPTIVAAAEFVVAGSTICLIC	22	1	4	2
Curtobacterium sp. MCLR17_039.	PZE89091.1	A1	MNSEVLEVQAFANAALSSAEAGARADASIPAMTTPTIVAAAEFVVAGSTICLIC	PAMTTP	TTPTIVAAAEFVVAGSTICLIC	22	1	4	2
Curtobacterium sp. UNCCL17	WP_027467256.1	A1	MNSEVLEVQAFANAALSSAEAGARADASIPAMTTPTIVAAAEFVVAGSTICLIC	PAMTTP	TTPTIVAAAEFVVAGSTICLIC	22	1	4	2
Herbiconiux ginsengi.	SDZ55834.1	A1	MQSEVLEVQEFANQMMRHAEPGMRGDASNPAMTTPAFVTAAQFVIQGSTICLIC	PAMTTP	TTPAFVTAAQFVIQGSTICLIC	22	1	4	2
Rathayibacter rathayi	PPG92752.1	A1	Incomplete Sequence
Rathayibacter tritici	WP_104258664.1	A1	MNSEVLEVQTFANAALSSVEAGARTDGSIPAMTTPTVVVATEYVVAGSTVCLIC	PAMTTP	TTPTVVVATEYVVAGSTVCLIC	22	1	5	2
Streptomyces barkulensis	WP_101256405.1	A1	MRSELTATRPDSADIRPEALAAQDFANTVLSGSAPGFHSDCETPAMATPATPTAAQFVIQGSTICLVC	PAMATP	ATPATPTAAQFVIQGSTICLVC	22	1	4	2
Streptomyces bikiniensis	WP_030214176.1	A1	MTRQDSTAVHPEVLAAQDFANTVLEGAAPGFHSNCETPAMATPATPTVAQFVIQGSTICLVC	PAMATP	ATPATPTVAQFVIQGSTICLVC	22	1	4	2
Streptomyces griseus subsp. griseus (strain JCM 4626 / NBRC 13350)	BAG23193.1	A1	MRLDSIATQETATALPESMATQDFANSVLAGAVPGFHSDAETPAMATPAVAQFVIQGSTICLVC	PAMATP	ATPAVAQFVIQGSTICLVC	19	1	2	2
Streptomyces griseus.	SQA21399.1	A1	MRLDSIATQETATALPESMATQDFANSVLAGAVPGFHSDAETPAMATPAVAQFVIQGSTICLVC	PAMATP	ATPAVAQFVIQGSTICLVC	19	1	2	2
Streptomyces luteocolor	WP_055697679.1	A1	MTRPDSAIRPEALAAQEFANTVLSGAAPGFHADCETPAMATPATPTAAQFVIQGSTICLVC	PAMATP	ATPATPTAAQFVIQGSTICLVC	22	1	4	2
Streptomyces silaceus	WP_055697679.1	A1	MTRPDSAIRPEALAAQEFANTVLSGAAPGFHADCETPAMATPATPTAAQFVIQGSTICLVC	PAMATP	ATPATPTAAQFVIQGSTICLVC	22	1	4	2
Streptomyces sp. ACT-1.	EGE46003.1	A1	MRLDSIATQETATALPESMATQDFANSVLAGAVPGFHSDAETPAMATPAVAQFVIQGSTICLVC	PAMATP	ATPAVAQFVIQGSTICLVC	19	1	2	2
Streptomyces sp. AZ1-7	WP_120700611.1	A1	MRLNSIAAQEKDTGIRPESIATQEFANGVLRDAAPGFHSDSEIPAMATPATPTAAQFVIQGSTICLVC	PAMATP	ATPATPTAAQFVIQGSTICLVC	22	1	4	2
Streptomyces sp. CB02009.	OKJ59747.1	A1	MTLTSSNSAEALAAQDFANTVLSAAGPGFHADCETPAMATPATPTVAQFVVQGSTICLVC	PAMATP	ATPATPTVAQFVVQGSTICLVC	22	1	4	2
Streptomyces sp. DS1-2	RKN13426.1	A1	MRLNSIAAQEKDTGIRPESIATQEFANGVLRDAAPGFHSDSEIPAMATPATPTAAQFVIQGSTICLVC	PAMATP	ATPATPTAAQFVIQGSTICLVC	22	1	4	2
Streptomyces sp. MnatMP-M77	WP_003970680.1	A1	MRLDSIATQETATALPESMATQDFANSVLAGAVPGFHSDAETPAMATPAVAQFVIQGSTICLVC	PAMATP	ATPAVAQFVIQGSTICLVC	19	1	2	2
Streptomyces sp. OH-4156.	ADR72964.1	A1	MRSEMTLTSTNSAEALAAQDFANTVLSAAAPGFHADCETPAMATPATPTVAQFVIQGSTICLVC	PAMATP	ATPATPTVAQFVIQGSTICLVC	22	1	4	2
Streptomyces sp. OspMP-M43	SCE46418.1	A1	MRLDSIATQETATALPESMATQDFANSVLAGAVPGFHSDAETPAMATPAVAQFVIQGSTICLVC	PAMATP	ATPAVAQFVIQGSTICLVC	19	1	2	2
Streptomyces sp. WMMB 714	WP_045866316.1	A1	MTDPDTVSPESVATQEFANSVLAGAAPGFYSDSDVPAMATPATPTAAQFVVQGSTICLVC	PAMATP	ATPATPTAAQFVVQGSTICLVC	22	1	4	2
Acaricomes phytoseiuli DSM 14247	WP_018133655.1	A2	MSSTLVQTPSVEDSVNAMFSHIDQGFVNAHNEPAMTTPSAIVTQTLVVGSTICLVC	PAMTTP	TTPSAIVTQTLVVGSTICLVC	21	2	5	2
Actinomyces sp. 299	WP_127841866.1	A2	MSDLGIAPTVEQLEKVANREFSGISEGFVNSHNLPTMTTPVTPATPGALEVVVTGSTICLGC	PTMATP	TTPVTPATPGALEVVVTGSTICLGC	25	1	6	2
Cellulomonas sp. 73-145	OJV60999.1	A2	MAQANTLAPDSSIAQAVNEVFADVQAGFVNRHNEPAMTTPAIVYEAAVTVVAGSTICLIC	PAMTTP	TTPAIVYEAAVTVVAGSTICLIC	23	1	4	2
Microbacterium azadirachtae.	WP_045251506.1	A2	MSTTLTASRALEAEVNAIFGDVEAGFAETSEMPVMTTPMIVPAATMVIQGSTICLVC	PVMTTP	TTPMIVPAATMVIQGSTICLVC	22	1	4	2
Microbacterium sp. Cl127	WP_091734671.1	A2	MEINMSTTLIASRALEAEVNAIFGDVEAGFAETSEMPVMTTPMIVPAATMVIQGSTICLVC	PVMTTP	TTPMIVPAATMVIQGSTICLVC	22	1	4	2
Paenarthrobacter nicotinovorans	WP_064723073.1	A2	MSSILVEPSVEDSVNARFSSVDQGFINAHNEPAMTTPSAIVTQTLVVGSTICLIC	PAMTTP	TTPSAIVTQTLVVGSTICLIC	21	2	5	2
Rathayibacter rathayi	SOE04650.1	A2	MTSEVLEVQTFANSALWSVEAGAQTDGSIPAMTTPTVVVATEYVVAGSTICLIC	PAMTTP	TTPTVVVATEYVVAGSTICLIC	22	1	5	2
Rothia dentocariosa (strain ATCC 17931 / CDC X599 / XDIA)	NOT Annotated	A2	MNVSDLANSIEIDTTPGAADYAMNSAQPSMTTPAGVYAVAEMAVAGSTICLVC	PSMTTP	TTPAGVYAVAEMAVAGSTICLVC	23	1	3	2
Streptomyces sp. MJM8645	WP_079136211.1	A2	MNATESRVEFVTDAVNASFAEAQEGFVNAHNAPAMTTPTIIAVCEVVVTGSTICLGC	PAMTTP	TTPTIIAVCEVVVTGSTICLGC	22	1	5	3

## Sheet: Type B linaridin
Producing Organism	LinL	Type	LinA	LinA Cleavage-site	LinA core	Core length	Ser in Core	Thr in Core	Cys in Core
Micromonospora sp. LB39	WP_124778371.1	B	MSLVAQFANESLTDVSPGMLSETDAAARLDTPADPVMATPLIVETVFLATGMLAANIANYVDRNNY	PVMATP	ATPLIVETVFLATGMLAANIANYVDRNNY	29	0	3	0
Streptomyces auratus AGR0001	WP_106430490.1	B	MSVVANFANTELADVTPGRIGNDATPTMLTPLAALATPEGVAVTSATAYALHEVTKDIQR	PTMLTP	LTPLAALATPEGVAVTSATAYALHEVTKDIQR	32	1	5	0
Streptomyces chrestomyceticus JCM 4735	WP_125049434.1	B	MSILADFANAELTDVKPGRIGADSTPTMVTPLATIATPEATPVGFAATSATAVALDKVTHNIG	PTMVTP	VTPLATIATPEATPVGFAATSATAVALDKVTHNIG	35	1	7	0
Streptomyces hoynatensis	WP_120685129.1	B	MSVVAEFANASLADVTPGPLMGTEAGLSSDAAPVLCTPAATIACPEGWAILVAVADAVWNVTQEITQG	PVLCTP	CTPAATIACPEGWAILVAVADAVWNVTQEITQG	33	0	4	2
Streptomyces hyalinus	WP_126643821.1	B	MSPVAQFANASLTDVSPGMLTGIDAARLDSPADPVMATPLITAVFAVATDMLTQNIANYVNRNAH	PVMATP	ATPLITAVFAVATDMLTQNIANYVNRNAH	29	0	4	0
Streptomyces luteus.	WP_043376870.1	B	MSVVADFANAELTDVTPGRMGNDATPTMLTPLATLATPEGVAVTSATAYALNEITNDLAG	PTMLTP	LTPLATLATPEGVAVTSATAYALNEITNDLAG	32	1	6	0
Streptomyces monomycini	WP_050502306.1	B	MSILADFANAELADVKPGRIGADSTPTMVTPLATIATPEATPVGFAATSATAVALDKVTHNVG	PTMVTP	VTPLATIATPEATPVGFAATSATAVALDKVTHNVG	35	1	7	0
Streptomyces noursei ATCC 11455.	WP_099055705.1	B	MSIVADFANTELVDVEPGRIGNDATPTMLTPLATLATPEGVAVTSATAYALHEVTKDIQR	PTMLTP	LTPLATLATPEGVAVTSATAYALHEVTKDIQR	32	1	6	0
Streptomyces noursei.	PNE36148.1	B	MAEFANTQLVDVKPGRIGSDAAPTMMTPLATVATPEAVSAGIAVTSATAAALNMVTHNVQHG	PTMMTP	MTPLATVATPEAVSAGIAVTSATAAALNMVTHNVQHG	37	2	6	0
Streptomyces rimosus subsp. Paromomycinus	WP_125058772.1	B	MSILADFANAELTDVKPGRIGADSTPTMVTPLATIATPEATPVGFAATSATAVALDKVTHNIG	PTMVTP	VTPLATIATPEATPVGFAATSATAVALDKVTHNIG	35	1	7	0
Streptomyces scabrisporus.	OPC77101.1	B	MLSGIDAARLDSPADPVMATPLITAVFAVATDMLAQNIANYVNRNAH	PVMATP	ATPLITAVFAVATDMLAQNIANYVNRNAH	29	0	3	0
Streptomyces sp. 2112.2	SEE50226.1	B	MSVVANFANTELADVNPGRIGNDATPTMLTPLAALATPEGVAVTSATAYALHEVTKDIQR	PTMLTP	LTPLAALATPEGVAVTSATAYALHEVTKDIQR	32	1	5	0
Streptomyces sp. 2314.4.	SED34630.1	B	MSVVANFANTELADVNPGRIGNDATPTMLTPLAALATPEGVAVTSATAYALHEVTKDIQR	PTMLTP	LTPLAALATPEGVAVTSATAYALHEVTKDIQR	32	1	5	0
Streptomyces sp. 2323.1.	SOE12060.1	B	MSVVANFANTELADVNPGRIGNDATPTMLTPLAALATPEGVAVTSATAYALHEVTKDIQR	PTMLTP	LTPLAALATPEGVAVTSATAYALHEVTKDIQR	32	1	5	0
Streptomyces sp. 2333.5.	PJJ03558.1	B	MSVVANFANTELADVNPGRIGNDATPTMLTPLAALATPEGVAVTSATAYALHEVTKDIQR	PTMLTP	LTPLAALATPEGVAVTSATAYALHEVTKDIQR	32	1	5	0
Streptomyces sp. 769.	WP_039641115.1	B	MSVVAEFANTQLVDVKPGRIGSDAAPTMMTPLATVATPEAVSAGIAVTSATAAALNMVTHNVQHG	PTMMTP	MTPLATVATPEAVSAGIAVTSATAAALNMVTHNVQHG	37	2	6	0
Streptomyces sp. CB01580.	OKJ27839.1	B	MSLVSEFANETLTDVAPGMLSATDVATRLDTPADPVMATPLIVETVLLTTGWIANNIANYVDRVNY	PVMATP	MITPLATLATPEATPVGFAATSATAAAVNMITHDVTRH	38	1	8	0
Streptomyces sp. CT34	WP_078894692.1	B	MAGEFAQTTERGQQMSVLAEFANTELVDVEPGRLGSEATPTMITPLATLATPEATPVGFAATSATAAAVNMITHDVTRH	PTMITP	ITPLATLATPEATPVGFAATSATAAAVNMITHDVTRH	37	1	8	0
Streptomyces sp. MH60.	PPS88677.1	B	MSVVADFANTELTDVTPGRMGNDATPTMLTPLATLATPEGVAVTSATAYALNEITNDLAG	PTMLTP	LTPLATLATPEGVAVTSATAYALNEITNDLAG	32	1	6	0
Streptomyces sp. NEAU-D10	WP_128506956.1	B	MSVVAEFANTQLVDVQPGQVGAHAAPTMITPLATIATPEAVPIGVAVTSATAIAVNAVTQKVAG	PTMITP	ITPLATIATPEAVPIGVAVTSATAIAVNAVTQKVAG	36	1	6	0
Streptomyces sp. NRRL S-1448	WP_030414970.1	B	MSVVAEFANTNLVDVQPGRIGSDAAPTMMTPLATVATPEAVSAGIAVTCATAIALNQVTHNVQHG	PTMMTP	MTPLATVATPEAVSAGIAVTCATAIALNQVTHNVQHG	37	1	6	1
Streptomyces sp. NRRL S-337	WP_030801613.1	B	MSVVAEFANTNLVDVKPGRIGSDAAPTMMTPLATVATPEAVSAGIAVTCATAIALNQVTHNVQHG	PTMMTP	MTPLATVATPEAVSAGIAVTCATAIALNQVTHNVQHG	37	1	6	1
Streptomyces sp. PRh5.	EXU61864.1	B	MSLVAQFANEALTDISPGMLSETDAASRLDGPADPVMVTPFAALTVTCPEVAALAGAAFGALAANVANYVGRNAH	PVMVTP	VTPFAALTVTCPEVAALAGAAFGALAANVANYVGRNAH	38	0	3	1
Streptomyces sp. QL37.	PPQ56338.1	B	MSIVAQFANESLTDVTPGVLSGTATLGLNTPADPVMATPVLAFEVFLIATEMLYDNVQNYTNS	PVMATP	ATPVLAFEVFLIATEMLYDNVQNYTNS	27	1	3	0
Streptomyces viridochromogenes (strain DSM 40736 / JCM 4977 / BCRC1201 / Tue 494)	EFL33871.1	B	MSVVADFANTELADVTPGRIGNDATPTMLTPLAALATPEGVAVTAATAYALNEVTNDLAG	PTMLTP	LTPLAALATPEGVAVTAATAYALNEVTNDLAG	32	0	5	0
Streptomyces yunnanensis.	WP_073444543.1	B	MSTRKRTEMSVVAEFANTQLVDVKPGRIGSDAAPTMMTPLATVATPEAVSAGIAVTSATAAALNMVTHNVQHG	PTMMTP	MTPLATVATPEAVSAGIAVTSATAAALNMVTHNVQHG	37	2	6	0

## Sheet: Type C linaridin
Producing Organism	LinL	Type	LinA1 Candidate	Cleavage-site	LinA1 core	Core length	Ser in Core	Thr in Core	Cys in Core	LinA2 Candidate	Cleavage-site	LinA2 core	Core length	Ser in Core	Thr in Core	Cys in Core	LinA3 Candidate	Cleavage-site	LinA3 core	Core length	Ser in Core	Thr in Core	Cys in Core	LinA4 Candidate	Cleavage-site	LinA4 core	Core length	Ser in Core	Thr in Core	Cys in Core	LinA5 Candidate	Cleavage-site	LinA5 core	Core length	Ser in Core	Thr in Core	Cys in Core
Actinobacteria bacterium OK074.	KPH97806.1	C1	MNAVAVHLNGLDLGSIRQGRAYDRQGHPVVSAATVVIGEVVGAVGGVATAVAGAVAASANDDACFDAADGGAGVCG	PAMATP						MNTAADHLNRLDLGPIRQSGVYAEPAAPIVSVAAAAVAVPVGGAVAGVATAFVASAIDAAQGDACFDAADGGAGVCG	PAMATP
Alloactinosynnema sp. L-07.	WP_082859669.1	C1	MSTLVRHANEISPDLFGDLDAQTGARSLSGMTPVMATPTAVALGIAISAVAFHAGYMYGIARNMAEGSVVLPQ	PVMATP	ATPTAVALGIAISAVAFHAGYMYGIARNMAEGSVVLPQ	38	2	2	0	MLEKVNASAVFADIPLRADVPMTVGAASPVLATPATIVGIAAGVAVVAGVAGAFYAGYQIGRAIGHQNPLPQ	PVLATP	ATPTAVALGIAISAVAFHAGYMYGIARNMAEGSVVLPQ	38	2	2	0
Amycolatopsis antarctica.	OZM71979.1	C1	MSNLADKVNADRELARTPLLATEPQHVGALTPVLATPAAFGAGLAGAAAVAGTFGAGYVAGNAIGG	PVLATP	ATPAAFGAGLAGAAAVAGTFGAGYVAGNAIGG	32	0	2	0	MDKLVSYTNAVSEDMFGELELAVDVRDMSAATPCMATPAAVAAGATLGAAAFGAGFGIGYAYG	PCMATP	ATPAAVAAGATLGAAAFGAGFGIGYAYG	28	0	2	0
Auritidibacter sp. NML120779	WP_110098360.1	C1	MEHIIEKVERETEPQLSEHSSMRNPGLDPVMATPAAFVGAAGYGWITLQAYDMGREHAGANG	PVLATP	ATPAAFVGAAGYGWITLQAYDMGREHAGANG	31	0	2	0
Blastococcus sp. Marseille-P5729	WP_106848708.1	C1	MRNLARNVNENPSFDLGDLTPTTEGRKLDPHAPVLATPAAAAAATVGAAATVGAGVAGFVAEEAADG	PVLATP	ATPAAAAAATVGAAATVGAGVAGFVAEEAADG	32	0	3	0
Citricoccus muralis	WP_115931760.1	C1	MNEKASYDLAYGAVAPSSAARINPVLATPGLVAFGAAFAKGAAAGGAVVAAGIAAYTVTGDS	PLAATP	ATPGLVAFGAAFAKGAAAGGAVVAAGIAAYTVTGDS	36	1	3	0	MTAVAEFMNAQEINFEGGSMSTAGAPVLGTPAAAAPVAVATCWKVAGGVAGFGAVVGAAAALFTVANGD	PVLGTP	GTPAAAAPVAVATCWKVAGGVAGFGAVVGAAAALFTVANGD	41	0	3	1
Curtobacterium sp. MCLR17_031.	PZE55388.1	C1	MQRKDTSMTTIADIAFDSDRGQRFAPEQPLAATPLAALAATSVFTGAVAAYAVEETVGN	PLAATP	ATPLAALAATSVFTGAVAAYAVEETVGN	28	1	4	0
Curtobacterium sp. MCLR17_043.	PYY47779.1	C1	MQRKDTSMTTIADIAFDSDRGQRFAPEQPLAATPLAALAATSVFTGAVAAYAVEETVGN	PLAATP	ATPLAALAATSVFTGAVAAYAVEETVGN	28	1	4	0
Curtobacterium sp. PhB170(Curtobacterium sp. PhB131)	WP_123353910.1	C1	MGKTMTSLASRVNSDRSIANLQMDRTNWSGAPGELPVLATPATVTAAAAFVAANKGAVAGAAAFAGLFGAGVWVGVATAD	PVLATP	ATPATVTAAAAFVAANKGAVAGAAAFAGLFGAGVWVGVATAD	42	0	4	0
Curtobacterium sp. YR515.	SFF54165.1	C1	MQQTRQLDAVPFDSDEATTFCGLRPVAATPAAVAWAGAVVAAAGVGAAIGDAVD	PVAATP	ATPAAVAWAGAVVAAAGVGAAIGDAVD	27	0	1	0	MTSAHRAGNRAQRPTITIAERKESSMTTIADIAFDSDRGQRFAPEQPLAATPLAALAATSVFTGAVAAYAVEEAVGN	PALATP	ATPLAALAATSVFTGAVAAYAVEEAVGN	28	1	3	0
Kitasatospora albolonga.	ARF74359.1	C1	MSDIAAYFNARQDLGGIGSAHVPAADAPLLATPATITTIAGWKAVGAFAAGAGCVVGAYTAGKANG	PLLATP	ATPATITTIAGWKAVGAFAAGAGCVVGAYTAGKANG	36	0	5	1	MTNVITRLHATGQLPVTAIADTESGGLTAAAYPVLGTPAFAVPFTAKAFSAGIAFGAATVAAYDAGAGK	PVLGTP	GTPAFAVPFTAKAFSAGIAFGAATVAAYDAGAGK	34	1	3	0
Leifsonia aquatica ATCC 14665.	ERK70868.1	C1	MLLQAIEDQTSRAGVSLERMTITRKPDAAVLATPTLAMAFGALQGGWFVGEMVKNVIRGG	AVLATP	ATPTLAMAFGALQGGWFVGEMVKNVIRGG	29	0	2	0
Leifsonia sp. ALI-44-B.	WP_077054870.1	C1	MNPIEKHAHEAFSGSDPLRPLEVPSDAAPVLATPALGYGALTFAAFMAGNVVTDFVGDESPTEGGIDELVGKSGSELLALRAERLTRG	PVLATP	ATPALGYGALTFAAFMAGNVVTDFVGDESPTEGGIDELVGKSGSELLALRAERLTRG	57	3	5	0	MTNSIESFANDFADSTLRPLELSPAVGPVLATPAYAAYATGVAVTFTLGIISDAVGYTDADDVLDGDTPEGASADQLIRARIDGLQ	PVLATP	ATPAYAAYATGVAVTFTLGIISDAVGYTDADDVLDGDTPEGASADQLIRARIDGLQ	56	2	6	0
Microbacterium sp. RURRCA19A	WP_076492912.1	C1	MATLEARVGDAVTVFSSRPAIGEAVRVRSDADGPVLATPLALAGAFAGGAAIGGGLVAAFEAGRAVAGG	PVLATP	ATPLALAGAFAGGAAIGGGLVAAFEAGRAVAGG	33	0	1	0	MMTMTMMSRDAALSARVGAAVAAIPDDGPFGNAVSAPVLGTPATVAAAPAAVATWKLAAAAVGGGVSVVGAYVAGRAVGTW	PVLGTP	GTPATVAAAPAAVATWKLAAAAVGGGVSVVGAYVAGRAVGTW	42	1	4	0
Microbispora sp. GMKU363	WP_055482108.1	C1	MTSLVDYTNAVSPEMFGDLRETAEGHGLTAASPVLATPTAVALGVAIGAVAFHAGYMYGIARNMAEGKYPQPKQLPQ	PVLATP	ATPTAVALGVAIGAVAFHAGYMYGIARNMAEGKYPQPKQLPQ	42	0	2	0	MPLLAEKVNADPALGAISIHSTEPCHEIGGAPVLATPATIVGVAAGVGLVGSVVGLFAAGYAMGRNFGGTRPPKSEQLPS	PVLATP	ATPATIVGVAAGVGLVGSVVGLFAAGYAMGRNFGGTRPPKSEQLPS	46	3	3	0
Micromonospora rosaria.	Not Annotated	C1	MSDPLASVNSSRYLKTVPVRAERSTWLGRKDGSPVMLLPTIVTPAIVTGTVNVATQVVAQVTGVRQPDPNATDPSNLA	PTIATP	VTPAIVTGTVNVATQVVAQVTGVRQPDPNATDPSNLA	37	1	6	0
Micromonospora rosaria.	WP_067365560.1	C1	MTALVAHTNEISAEMFGELTEDRTAEGLAGLTPVLATPTAVALGVAVGAVAFHAGYMVGIARNMAEGTRPRPQ	PVLATP	ATPTAVALGVAVGAVAFHAGYMVGIARNMAEGTRPRPQ	38	0	3	0	MSVLATRVNTDPDLAAIPIDSGEACSQVGGMPVLATPATIVSVAAGVGLVGSVAALFGAGYVAGRNLGGTRPPVQN	PVLATP	ATPATIVSVAAGVGLVGSVAALFGAGYVAGRNLGGTRPPVQN	42	2	3	0
Micromonospora wenchangensis.	OWV06807.1	C1	MNQMTALVDHTNDISLEMFGELTEADRNAHGLAGLTPVLATPTAVALGVAVGAVAFHAGYMVGIARNMAEGTRPLPK	PVLATP	ATPTAVALGVAVGAVAFHAGYMVGIARNMAEGTRPLPK	38	0	3	0	MSVLANRVNADPALATIPIHSDEARNHVGGMPVLATPATIVSVAAGVGLVGSVAALFGAGYVAGRNLGGTRPPAPK	PVLATP	ATPATIVSVAAGVGLVGSVAALFGAGYVAGRNLGGTRPPAPK	42	2	3	0
Micromonospora yangpuensis.	SCL65348.1	C1	MTALVDHTNDVSLEMFGELNEADRTAQGLAGLTPVLATPTAVALGVAVGAVAFHAGYMVGIVRNMAEGTVTPRPK	PVLATP	ATPTAVALGVAVGAVAFHAGYMVGIVRNMAEGTVTPRPK	39	0	4	0	MSVLATKVNADPALAAIPIHSDEACNQVGGMPVLATPATIVGVAAGVGLVGSVAALFGAGYVVGRNLGGTTPRPK	PVLATP	ATPATIVGVAAGVGLVGSVAALFGAGYVVGRNLGGTTPRPK	41	1	4	0
Microtetraspora fusca	WP_066941625.1	C1	MSTLADHTNTISPGRFGDLTETTRGRGLTAATPVLATPSAVALGVAIGMAAFHAGYMYGIARSMAEGTVAN	PVLATP	ATPSAVALGVAIGMAAFHAGYMYGIARSMAEGTVAN	36	2	2	0	MPLLAEKANADPALAAISIYSTEPCHEIGGAPVLATPATIVGVAAGVGLVGSVVGLFAAGYAIGHSGTLPK	PVLATP	ATPATIVGVAAGVGLVGSVVGLFAAGYAIGHSGTLPK	37	2	3	0	MSTLADYTNAVSPETFGDLTETTAGRGLTAGTPVLATPAVVVTMVAAFAAGYAMGRSGTVPK	PVLATP	ATPAVVVTMVAAFAAGYAMGRSGTVPK	27	1	3	0	MTLLAEKVNADPAFDAISIHSTYPVHTSVEVPVLCVTATMGAASGLSTANVGAVNGGTVLTIA	PVLCVT	CVTATMGAASGLSTANVGAVNGGTVLTIA	29	2	5	1
Microtetraspora malaysiensis	WP_067136950.1	C1	MSTLVDYTNAVSPGMFGDLTETTGGRGLTAETPVLATPAVVVTMVAAFAAGYAMGRGAGTLPN	PVLATP	ATPAVVVTMVAAFAAGYAMGRGAGTLPN	28	0	3	0	MTLLAEKVNADPALTAISIYSTEPCHEIGGAPVLATPATIVGVAAGVGLVGSVVGLFAAGYAFGHSGTLPK	PVLATP	ATPATIVGVAAGVGLVGSVVGLFAAGYAFGHSGTLPK	37	2	3	0	MSTLADYTNTISPGKFGDLTETTGGRGLTAATPVLATPSAVALGVAIGMAAFHAGYMYGIARSMAEGTVAN	PVLATP	ATPSAVALGVAIGMAAFHAGYMYGIARSMAEGTVAN	36	2	2	0
Nocardia terpenica.	KZM74593.1	C1	MFQLMEEVMLLEKVNADNTLVGELKAAALPGPATPVMSTPTLVRVIANVAQATKATRAAG	PVMSTP	STPTLVRVIANVAQATKATRAAG	23	1	4	0
Nocardiopsaceae bacterium YIM 96095	WP_123202356.1	C1	MEELLDRTNEQSDDLFGVLTPQTQVEFDTGNTPVLATPAAAAAGAGATVGAFAAGVAVGYAVG	PVLATP	ATPAAAAAGAGATVGAFAAGVAVGYAVG	28	0	2	0	MVVDTLLEKVNGSSDLVRVSIREEQATTMVGLGPVLATPGAFAAGAGAACAVAGAFGAGYAIGQDLAG	PVLATP	ATPGAFAAGAGAACAVAGAFGAGYAIGQDLAG	32	0	1	1
Nocardiopsis flavescens.	SHK24989.1	C1	MRTQVRPHWDIVPGALEEDAEGQVFESGLPVTATPVVVGAAGAIVVAYAAGALANALGGGTHPTLPHA	PVTATP	ATPVVVGAAGAIVVAYAAGALANALGGGTHPTLPHA	36	0	3	0	MNPLTPPASLVGSGALTETDGGSVRLGSAPVTATPLAVTAGLAAGVALGYALANSTHPTLPHA	PVTATP	ATPLAVTAGLAAGVALGYALANSTHPTLPHA	31	1	4	0	MNDVSFLSRPGSMADIDIRDPHGRSVSGQAPVTATPGVAAGVAIGYALIYAFNAGLNSTHPTLPHA	PVTATP	ATPGVAAGVAIGYALIYAFNAGLNSTHPTLPHA	33	1	3	0
Prauserella sp. YIM 121212	WP_110337309.1	C1	MSNVEAFANEHVDGVLSPLEVTTAVGPVLATPAYAGYAAGAGAVFTLGLISDAIESHHAAEVTPTGPVPSYGSVDQLLGMRVASIS	PVLATP	ATPAYAGYAAGAGAVFTLGLISDAIESHHAAEVTPTGPVPSYGSVDQLLGMRVASIS	57	6	4	0
Salinispora pacifica CNT131	WP_050590679.1	C1	Incomplete Sequence
Salinispora pacifica CNT851	WP_018824032.1	C1	MASIADFMNAQLLGPIEQGMTKGNGVPVMATPAVAVPASVKITAAVVAFTVPVAAYVAGRAVN	PVMATP	ATPAVAVPASVKITAAVVAFTVPVAAYVAGRAVN	34	1	3	0
Streptomyces abyssalis	WP_070011781.1	C1	MLEKVNASAELDALAVQVDEGEWARPTAPVLATPAVIGTAVGAAGAVVGALVGGFIVADNVLGGS	PVLATP	ATPAVIGTAVGAAGAVVGALVGGFIVADNVLGGS	34	1	2	0	MLLEKVNNSEELSTLPLMLDEDKGAAPTEPVLATPAAVAAGIAGVTLVATAVAGGIGLAVTVNGNS	PVLATP	ATPAAVAAGIAGVTLVATAVAGGIGLAVTVNGNS	34	1	4	0
Streptomyces abyssalis.	Not Annotated	C1	MNDVTSHINASAELASVEITDAEGVVFTDYTPVMGTPGAFLGGVAIASATVAAFEQGQG	PVMGTP	GTPGAFLGGVAIASATVAAFEQGQG	25	1	2	0
Streptomyces antibioticus.	AOE46837.1	C1	MNDITAFINEDARLDEVPIERAEGTVLVEQGVTVLATPSANFCLTFAIGK	TVLATP	ATPSANFCLTFAIGK	15	1	2	1
Streptomyces barkulensis	WP_101258823.1	C1	MSKIVESVVAVTPEELTDETHGEFGAMMPIQATPGLVAFGVGFAGGAGAAWVTVQAYEAGRTAG	PIQATP	ATPGLVAFGVGFAGGAGAAWVTVQAYEAGRTAG	33	0	3	0	MEQKVAAFMNEQDFGPLEQGYQDDTPAPVLATPGAVATCWYVGGAVVGAGSVVGAYVTGRVVG	PVLATP	ATPGAVATCWYVGGAVVGAGSVVGAYVTGRVVG	33	1	3	1
Streptomyces bicolor	WP_031498384.1	C1	MQDIAEYMNNHPDLQGDITDADGAVRTEMLPVLATPVIVARTALATVAAYTVTRNHIG	PVLATP	ATPVIVARTALATVAAYTVTRNHIG	25	0	5	0
Streptomyces bikiniensis	WP_030221144.1	C1	MSRIVDSVVAVTPQHLSDEAHGEFGAMMPVQATPALIAFGVGFAGGAGAAWVTVQAYEAGAND	PVQATP	ATPALIAFGVGFAGGAGAAWVTVQAYEAGAND	32	0	2	0	MEHKIAGFMNTQDFGTLEQGYQDDAAAPVLATPAAVATCWYVGGAVVGAGAVVGAYVTGRVNG	PVLATP	ATPAAVATCWYVGGAVVGAGAVVGAYVTGRVNG	33	0	3	1
Streptomyces bottropensis ATCC 25435	WP_005474565.1	C1	MNDFLLIPSVVALGIVGFLIATRAVSTPAVIGVALVVLWGACSQARAHTHARHTPSKKRRQHP	RAVSTP	STPAVIGVALVVLWGACSQARAHTHARHTPSKKRRQHP	38	3	3	1	MDLPLEEIILTSARPTLGTPRIGRGARAVQAAQVAGGLGEAAGGAANVAAAASAVEANQAAVEANQAVEAQANAANAQAAGGV	PTLGTP	GTPRIGRGARAVQAAQVAGGLGEAAGGAANVAAAASAVEANQAAVEANQAVEAQANAANAQAAGGV	66	1	1	0
Streptomyces europaeiscabiei	WP_060892338.1	C1	MEIPVEGVVYVAARPTLGTPRIARVGNRLGGLAQAAEGVGAIGALATAAVGVGQAAEANNLAAEANAQNAAALAAVGGAPPAA	PTLGTP	GTPRIARVGNRLGGLAQAAEGVGAIGALATAAVGVGQAAEANNLAAEANAQNAAALAAVGGAPPAA	66	0	2	0
Streptomyces fragilis	WP_108955792.1	C1	MSKIVRSVAAVTPEVLTEDVHGDSGSMMPIQATPALVAFGAGFAGGAGISWVCVQAYEAGAND	PIQATP	ATPALVAFGAGFAGGAGISWVCVQAYEAGAND	32	1	1	1	MEMKIAAFMNEQDLGSLERGYQDDAPAPVLATPLAAVATCWYVGGAVAGAAVVAGAYVTGRVVG	PVLATP	ATPLAAVATCWYVGGAVAGAAVVAGAYVTGRVVG	34	0	3	1
Streptomyces galbus	WP_033526319.1	C1	MEIPVEGVVYVAARPTLGTPRIARIGRIAQAAEGVGALAAAATAAVGVAQAAEANNLAAEANAQNQAALAAVGGTPPAV	PTLGTP	GTPRIARIGRIAQAAEGVGALAAAATAAVGVAQAAEANNLAAEANAQNQAALAAVGGTPPAV	62	0	3	0
Streptomyces gancidicus BKS 13-15.	EMF28263.1	C1	MEQKIAAFMNEQDLGSLEQGYRDDAPMPVLATPAAAVATCWYVGGAAAGAAAVVGAYVTGRVVG	PVLATP	ATPAAAVATCWYVGGAAAGAAAVVGAYVTGRVVG	34	0	3	1	MSRIVDSVVAVTPTDLTDDSQGEFGAMAPVQATPTLVAFGVGFAGGAGAAWVTVQAYEAGAND	PVQATP	ATPTLVAFGVGFAGGAGAAWVTVQAYEAGAND	32	0	3	0
Streptomyces geranii	WP_105970076.1	C1	MDLPVEGVILTSARPTLGTPRIGRVANAANALNALGGLADLAQAAGGVAQVVGAASAVEANQAAADANQAVANAANAQAAAAGGTV	PTLGTP	GTPRIGRVANAANALNALGGLADLAQAAGGVAQVVGAASAVEANQAAADANQAVANAANAQAAAAGGTV	69	1	2	0	MNDFLLVPFVVALGIVGFLIATRAVSTPAVIGVALVVLLGACSQARRNVHPKNTPAKKRRQHP	RAVSTP	STPAVIGVALVVLLGACSQARRNVHPKNTPAKKRRQHP	38	2	2	1
Streptomyces globisporus subsp. Globisporus	WP_030581595.1	C1	MNTSPIPAALRGVGGLSESASGRALSTFAPVAATPGIAAGAALGVALVNAFVAGYNHCGGNVELPM	PVAATP	ATPGIAAGAALGVALVNAFVAGYNHCGGNVELPM	34	0	1	1	MSKSSTPAVLTATGDLTESDPGVTLPALAPVTATPVAIAATLGAAFLAGYAAGRAAGSDVELPM	PVLATP	ATPVAIAATLGAAFLAGYAAGRAAGSDVELPM	32	1	2	0	MPEFRQPGWTRGIAPLDEGSGGQVFGAASPVAATPVVVASAGAVVIAFAAGVAARELANGGNVELPM	PVAATP	ATPVVVASAGAVVIAFAAGVAARELANGGNVELPM	35	1	1	0
Streptomyces griseus subsp. griseus (strain JCM 4626 / NBRC 13350)	BAG18345.1	C1	MPEFRQPGWTRGVAPLDESAGGQVFGGASPVAATPAVVATAGAVVVAFAAGVAARHLANGGNVELPM	PVAATP	ATPAVVATAGAVVVAFAAGVAARHLANGGNVELPM	35	0	2	0	MSMSPTPAALRGAGGLSESDPGRALSSLAPVTATPGVVAGVALGVALVNAFAAGYNHCGGNVELPM	PVTATP	ATPGVVAGVALGVALVNAFAAGYNHCGGNVELPM	34	0	1	1	MNKSSAPAVLTATGALTESDAGVTLPTLAPVAATPVAIAATMGVAFVAGYAAGRAATGNVELPM	PVAATP	ATPVAIAATMGVAFVAGYAAGRAATGNVELPM	32	0	3	0
Streptomyces griseus.	SQA25557.1	C1	MPEFRQPGWTRGVAPLDESAGGQVFGGASPVAATPAVVATAGAVVVAFAAGVAARHLANGGNVELPM	PVAATP	ATPAVVATAGAVVVAFAAGVAARHLANGGNVELPM	35	0	2	0	MNKSSAPAVLTATGALTESDAGVTLPTLAPVAATPVAIAATMGVAFVAGYAAGRAATGNVELPM	PVVATP	ATPVAIAATMGVAFVAGYAAGRAATGNVELPM	32	0	3	0	MSMSPTPAALRGAGGLSESDPGRALSSLAPVTATPGVVAGVALGVALVNAFAAGYNHCGGNVELPM	PVTATP	ATPGVVAGVALGVALVNAFAAGYNHCGGNVELPM	34	0	1	1
Streptomyces harbinensis.	SFS58203.1	C1	MARSTPFAQRAVSGPLLEDSPGDIGTAASPVLATPAAAAAFAAGATIVVGAYVVGRMVGGETEPVIQ	PVLATP	ATPAAAAAFAAGATIVVGAYVVGRMVGGETEPVIQ	35	0	3	0	MSRTTAYLNGCAALADLSVLDSAGRRSPAQPVLATPVTIVAFAGGVGAGAAIVAAFEAGRQAAGGSMEPIIT	PVLATP	ATPVTIVAFAGGVGAGAAIVAAFEAGRQAAGGSMEPIIT	39	1	3	0
Streptomyces iakyrus	NOT Annotated	C1	MTSISDHVNGRSPMLFGDLRTTHGARHLSELTPVMATPAAFAAGVGVSVAAYAVGYAVGALGSKQPS	PVMATP	ATPAAFAAGVGVSVAAYAVGYAVGALGSKQPS	32	3	1	0	MLTEHVNASSVLAEFPLRADRARRMDELTPVLATPGAVVVAVGLYVVATPYVAGAIGSKQPS	PVLATP	ATPGAVVVAVGLYVVATPYVAGAIGSKQPS	30	2	2	0	MSVLTERVNASSVLAELPLRADRAQQMDELAPVLATPATAVAFAAGVGVGVAVTNAFGAGLAAGGSKQPS	PVLATP	ATPATAVAFAAGVGVGVAVTNAFGAGLAAGGSKQPS	36	2	3	0	MSVLTERVNASRVLAELPLRADRAQQMDELAPVLATPSAALVAAAAAVAVALADIYTVAGSKQPN	PVLATP	ATPSAALVAAAAAVAVALADIYTVAGSKQPN	31	2	2	0	MSVLTERVNASSVLAELPLRSDRAQQMDELAPVLATPAIACMGFASVSGPSLAVAGSKQPS	PVLATP	ATPAIACMGFASVSGPSLAVAGSKQPS	27	5	1	1
Streptomyces ipomoeae 91-03.	EKX67238.1	C1	VDNLNLPVEGIILASARPTLGTPRIGRVGRGAGGGGGRGLAALGAIADLAGVAGGVGATVGAASSVEAANASVAADQAVAQAAADVAAGAGAPPA	PTLGTP	GTPRIGRVGRGAGGGGGRGLAALGAIADLAGVAGGVGATVGAASSVEAANASVAADQAVAQAAADVAAGAGAPPA	75	3	2	0
Streptomyces nanshensis.	Not Annotated	C1	MNDVTSHINASAELASVEITDAEGVVFTDYTPVMGTPGAFLGGVAIASATVAAFEQGQG	PVMGTP	GTPGAFLGGVAIASATVAAFEQGQG	25	1	2	0
Streptomyces nanshensis.	NOT Annotated	C1	MIDVTSHINESAELSSVEVTDAEGVVFTDYTPVLATPGAFLGGVAIASATVAAFEQGQG	PVLATP	ATPGAFLGGVAIASATVAAFEQGQG	25	1	2	0
Streptomyces niveus	WP_078073574.1	C1	MATIAEFMNDQKLGVLELGYKEDSQEPVLATPAAAVATCWYVGGAAAGVTVVAGAYVAGRVFG	PVLATP	ATPAAAVATCWYVGGAAAGVTVVAGAYVAGRVFG	34	0	3	1	MSRIIESVAAITPEHLTDGSHGDVVAMAPVQATPGLVAFGIGFAGGAGVSWVGVQAYEAGAND	PVQATP	ATPGLVAFGIGFAGGAGVSWVGVQAYEAGAND	32	1	1	0
Streptomyces noursei.	PNE37327.1	C1	MTEIVSFVNGLDLGAIETGEAHSDQAPVLATPAAALAAIGGAKAVGAFVGGATVVGGAYALGRAVG	PVLATP	ATPAAALAAIGGAKAVGAFVGGATVVGGAYALGRAVG	37	0	2	0	MIDVAAAANEMEIPEEGAIFPMATPVLATPAAFMGGIAISSAVVGAFEAGRNG	PVLATP	ATPAAFMGGIAISSAVVGAFEAGRNG	26	2	1	0
Streptomyces pini.	SFJ78400.1	C1	MEQKVAAFMNEQDFGPLEQGYQDDTPAPVLATPGAVATCWYVGGAVVGAGSVVGAYVTGRVVG	PVLATP	ATPGAVATCWYVGGAVVGAGSVVGAYVTGRVVG	33	1	3	1	MSKIVESVVAVTPEELTDETHGEFGAMMPIQATPGLVAFGVGFAGGAGAAWVTVQAYEAGRTAG	PIQATP	ATPGLVAFGVGFAGGAGAAWVTVQAYEAGRTAG	33	0	3	0
Streptomyces pseudogriseolus	WP_086681144.1	C1	MEQKIAAFMNEQDLGSLEQGYRDDAPMPVLATPAAAVATCWYVGGAAAGAAAVVGAYVTGRVVG	PVLATP	ATPAAAVATCWYVGGAAAGAAAVVGAYVTGRVVG	34	0	3	1	MSRIVDSVVAVTPTDLTDDSQGEFGAMAPVQATPTLVAFGVGFAGGAGAAWVTVQAYEAGAND	PVQATP	ATPTLVAFGVGFAGGAGAAWVTVQAYEAGAND	32	0	3	0
Streptomyces roseus.	WP_048476415.1	C1	MAKIAAFMNQQDMGPIAESELSVGGTPVMATPAVVAVPASVKITAGIVAFTIPVGAYVTGRVVN	PVMATP	ATPAVVAVPASVKITAGIVAFTIPVGAYVTGRVVN	35	1	4	0	MNSITESVRVIAGATLSQDTGERTTRMMPVAFTPAVLVTTPYAAGGLAAGAAAVGAYEAGRAAAKG	PVAFTP	FTPAVLVTTPYAAGGLAAGAAAVGAYEAGRAAAKG	35	0	3	0
Streptomyces scabiei	WP_086756725.1	C1	MDLPVEGVILASARPTLGTPRIGRVSGANALNALGGLADLAQAAGGVAQVVGAASAVEANNAAVDANQAVANAANAQAAAVGGAV	PTLGTP	GTPRIGRVSGANALNALGGLADLAQAAGGVAQVVGAASAVEANNAAVDANQAVANAANAQAAAVGGAV	68	2	1	0
Streptomyces scabiei.	WP_037689015.1	C1	MSSIENALNSVEIPVEGVVYVAARPTLGTPRIARIGRIAQAAEGIGAVAAAATAAVGVAQAAEANNLAAEANAQNQAALAAVGGAPAA	PTLGTP	GTPRIARIGRIAQAAEGIGAVAAAATAAVGVAQAAEANNLAAEANAQNQAALAAVGGAPAA	61	0	2	0
Streptomyces scabiei.	WP_059085106.1	C1	MNDFLLIPSVVALGIVGFLIATRAVSTPAVIGVALVVLWGACAQARSTVHPRHTPSKKRRQHP	RAVSTP	STPAVIGVALVVLWGACAQARSTVHPRHTPSKKRRQHP	38	3	3	1
Streptomyces scopuliridis RB72	WP_030350805.1	C1	MVEIVSYFNEKLDLGAIDQGESNSEQSPVLATPAAALAAIGGAKVVGAFVGGATLVGGAYALGKAVG	PVLATP	ATPAAALAAIGGAKVVGAFVGGATLVGGAYALGKAVG	37	0	2	0	MNNIIEAVNEMDIPAEGKVFPDATPVLATPGAFLGGVAVSSAVIGAFELGRGGGSAPATQL	PVLATP	ATPGAFLGGVAVSSAVIGAFELGRGGGSAPATQL	34	3	2	0
Streptomyces sp. 1121.2.	PIG13857.1	C1	MEQKIAAFMNEQDLGSLEQGYRDDAPMPVLATPAAAVATCWYVGGAAAGAAAVVGAYVTGRVVG	PVLATP	ATPAAAVATCWYVGGAAAGAAAVVGAYVTGRVVG	34	0	3	1	MSRIVDSVVAVTSADLTDDSQGEFGAMAPVQATPTLVAFGVGFAGGAGAAWVTVQAYEAGAND	PVQATP	ATPTLVAFGVGFAGGAGAAWVTVQAYEAGAND	32	0	3	0
Streptomyces sp. 1222.2	WP_097250956.1	C1	MEIPVEGVVYVAARPTLGTPRIARVGNRLGGLAQAAEGVGAIGALATAAVGVGQAAEANNLAAEANAQNAAALAAVGGAPAA	PTLGTP	GTPRIARVGNRLGGLAQAAEGVGAIGALATAAVGVGQAAEANNLAAEANAQNAAALAAVGGAPAA	65	0	2	0
Streptomyces sp. 1222.2.	SOD81765.1	C1	MNDFLLIPSVVALGIVGFLIATRAVSTPAVIGVALVVLWGACSQARSTIHARHTPSKKRRQHP	RAVSTP	STPAVIGVALVVLWGACSQARSTIHARHTPSKKRRQHP	38	4	3	1	MSSIENALNSVEIPVEGVVYVAARPTLGTPRIARVGNRLGGLAQAAEGVGAIGALATAAVGVGQAAEANNLAAEANAQNAAALAAVGGAPAA	PTLGTP	GTPRIARVGNRLGGLAQAAEGVGAIGALATAAVGVGQAAEANNLAAEANAQNAAALAAVGGAPAA	65	0	2	0
Streptomyces sp. 2132.2	WP_099889448.1	C1	MNSITESVRVIAGTTLSEDSGERTTRMMPVAFTPAVLVTTPYAAGGLAAGAAAVGAYEAGRAAAKG	PVAFTP	FTPAVLVTTPYAAGGLAAGAAAVGAYEAGRAAAKG	35	0	3	0	MAKIAAFMNQQDMGPIAESGLSVGGTPVMATPAVVAVPASVKITAGIVAFTIPVGAYVTGRVVN	PVMATP	ATPAVVAVPASVKITAGIVAFTIPVGAYVTGRVVN	35	1	4	0
Streptomyces sp. 2R.	WP_094211782.1	C1	MSTSSTPAALRGAGGLSESDPGRALSTLAPVAATPGIVAGAALGVALVNAFVAGYNHGGGNVELPM	PVAATP	ATPGIVAGAALGVALVNAFVAGYNHGGGNVELPM	34	0	1	0	MSKSSAPAVLTATGALTESDPGVTLPALAPVAATPVAIAATLGAAFIAGYAAGRAAGNVELPM	PVAATP	ATPVAIAATLGAAFIAGYAAGRAAGNVELPM	31	0	2	0	MPEFRQPGWTRGIAPLDESAGGQVFGGASPVAATPAVVATAGAVVIAFAAGVAARQLANGGNVELPM	PVAATP	ATPAVVATAGAVVIAFAAGVAARQLANGGNVELPM	35	0	2	0
Streptomyces sp. 3211.1	WP_053694177.1	C1	MTEIVTFVNNLDLGTIQAGETRTDQAPVLATPAAALAAIGGAKAVGAFVGGATVVGGAYALGRAIG	PVLATP	ATPAAALAAIGGAKAVGAFVGGATVVGGAYALGRAIG	37	0	2	0
Streptomyces sp. 3214.6.	SHI10714.1	C1	MEQKIAAFMNEQDLGSLEQGYRDDAPMPVLATPAAAVATCWYVGGAAAGAAAVVGAYVTGRVVG	PVLATP	ATPAAAVATCWYVGGAAAGAAAVVGAYVTGRVVG	34	0	3	1	MSRIVDSVVAVTSADLTDDSQGEFGAMAPVQATPTLVAFGVGFAGGAGAAWVTVQAYEAGAND	PVQATP	ATPTLVAFGVGFAGGAGAAWVTVQAYEAGAND	32	0	3	0
Streptomyces sp. 61.	PIG43642.1	C1	MNSITESVRVIAGATLSEDSGERTTRMMPVAFTPAVLVTTPYAAGGLAAGAAAVGAYEAGRAAAKG	PVLATP	FTPAVLVTTPYAAGGLAAGAAAVGAYEAGRAAAKG	35	0	3	0	MAKIAAFMNQQDMGPIAESGLSVGGTPVMATPAVVAVPASVKITAGIVAFTIPVGAYVTGRVVN	PVMATP	ATPAVVAVPASVKITAGIVAFTIPVGAYVTGRVVN	35	1	4	0
Streptomyces sp. AA0539	WP_019435954.1	C1	MSRTTAYLNGCAALADLSVLDSAGRRSPAQPVLATPVTIVAFAGGVGAGAAIVAAFEAGRQAAGGSMEPIIT	PVLATP	ATPVTIVAFAGGVGAGAAIVAAFEAGRQAAGGSMEPIIT	39	1	3	0
Streptomyces sp. AC1-42T.	PZT80113.2	C1	MAKIADFMNTQQLGPIEQGLTNTDGVPVMATPAVAVPVTVKITAGIVAFTIPVGAYVAGRVVN	PVLATP	ATPAVAVPVTVKITAGIVAFTIPVGAYVAGRVVN	34	0	4	0	MRTVTTPTLTGDAGISLKPMMPVTFTPAILVTTPYAAGGLAAGAASVAAYEAGRAAGAGK	PVTFTP	FTPAILVTTPYAAGGLAAGAASVAAYEAGRAAGAGK	36	1	3	0
Streptomyces sp. AC1-42W.	PZT75936.1	C1	MAKIADFMNTQQLGPIEQGLTNTDGVPVMATPAVAVPVTVKITAGIVAFTIPVGAYVAGRVVN	PVLATP	ATPAVAVPVTVKITAGIVAFTIPVGAYVAGRVVN	34	0	4	0	MRTVTTPTLTGDAGISLKPMMPVTFTPAILVTTPYAAGGLAAGAASVAAYEAGRAAGAGK	PVTFTP	FTPAILVTTPYAAGGLAAGAASVAAYEAGRAAGAGK	36	1	3	0
Streptomyces sp. ACT-1.	WP_003965564.1	C1	MPEFRQPGWTRGVAPLDESAGGQVFGGASPVAATPAVVATAGAVVVAFAAGVAARHLANGGNVELPM	PVLATP	ATPAVVATAGAVVVAFAAGVAARHLANGGNVELPM	35	0	2	0	MNKSSAPAVLTATGALTESDAGVTLPTLAPVAATPVAIAATMGVAFVAGYAAGRAATGNVELPM	PVAATP	ATPVAIAATMGVAFVAGYAAGRAATGNVELPM	32	0	3	0	MSMSPTPAALRGAGGLSESDPGRALSSLAPVTATPGVVAGVALGVALVNAFAAGYNHCGGNVELPM	PVTATP	ATPGVVAGVALGVALVNAFAAGYNHCGGNVELPM	34	0	1	1
Streptomyces sp. ADI97-07	WP_056795351.1	C1	MNASVFQTVPAAARPLTEEDPGYTATGTAPVAATPVLATAVFAAGFVAGVVVCDAIGDTSPVEQ	PVLATP	ATPVLATAVFAAGFVAGVVVCDAIGDTSPVEQ	32	1	3	1	MNDTSFLTRPGALTDIRVDDPQGRVIINHPPVMATPAVVSGVIIGVALVNAFVAGRDGGPLEPPIEIDVPA	PVMATP	ATPAVVSGVIIGVALVNAFVAGRDGGPLEPPIEIDVPA	38	1	1	0
Streptomyces sp. Amel2xB2	RAJ66736.1	C1	MIDVTSHINESAELSSVEVTDAEGVVFTDYTPVLATPGAFLGGVAIASATVAAFEQGQG	PVLATP	ATPGAFLGGVAIASATVAAFEQGQG	25	1	2	0	MLEEKLNLQIQDELHEEHAGEIADKAAPVLATPALAGAFVGGAAVVTGAYAAGKAVG	PVLATP	ATPALAGAFVGGAAVVTGAYAAGKAVG	27	0	2	0
Streptomyces sp. AmelKG-D3.	SCK62387.1	C1	MNMSPTPAALRGAGGLSESDPGRAHSTLVPVAATPGVLAGVAVGVALVNAFAAGYNHCGGNVELPM	PVLATP	ATPGVLAGVAVGVALVNAFAAGYNHCGGNVELPM	34	0	1	1	MNTSSTPAVLTATGALTESDPGATLPAIAPVAATPVVVVAALGAGFVAGYAAGRAAGNVELPM	PVAATP	ATPVVVVAALGAGFVAGYAAGRAAGNVELPM	31	0	1	0	MPEFRQPGWTRGLAPLDEGAGGQVFGGASPVAATPAVVATAGAVVVAFAAGVAARHLANGGNVELPM	PVAATP	ATPAVVATAGAVVVAFAAGVAARHLANGGNVELPM	35	0	2	0
Streptomyces sp. AZ1-7	WP_120696415.1	C1	MNDQSRRLYDSSALATVAVDDPRGWISARQKPVLSTPAVVAGLAIGYAMLNAFEAGRNGGPIRPAL	PVLSTP	STPAVVAGLAIGYAMLNAFEAGRNGGPIRPAL	32	1	1	0	MSAMPVSQLPADLAAMSELKEGAAGRVPATAQPVMATPTIALAFAAGVGIGFAACQVVGDIRPVEN	PVMATP	ATPTIALAFAAGVGIGFAACQVVGDIRPVEN	31	0	2	1
Streptomyces sp. CB02058.	WP_073749932.2	C1	MNDVSFLTRPGALTDIKVDDPQGRVIITQTPVMATPAVVAGVIIGAALVNAFVAGRDGGPLEPPIDVSVPS	PVMATP	ATPAVVAGVIIGAALVNAFVAGRDGGPLEPPIDVSVPS	38	2	1	0	MNAAVFQAVPAAARPLTEKDPGHTATGTAPVAATPVIVVTAFAAGVAAGVALCDAIGDTSPVEQ	PVAATP	ATPVIVVTAFAAGVAAGVALCDAIGDTSPVEQ	32	1	3	1
Streptomyces sp. CB02115.	WP_073742610.1	C1	MSTSPIPAALRGAGGLSESAPGQALSTFAPVAATPGIVAGAAIGVALVNAFVAGYNYTGNVELPM	PVAATP	ATPGIVAGAAIGVALVNAFVAGYNYTGNVELPM	33	0	2	0	MSKSSAPAALTATGALTESDPGVTLPGLAPVAATPVAIVASLGAAFVAGYAAGRAAGSDIELPM	PVAATP	ATPVAIVASLGAAFVAGYAAGRAAGSDIELPM	32	2	1	0	MPEFRQPGWTRGIAPLQEGAGGQVFGGASPVAATPVVVAGAGAVVVAFAAGVAARTLANGGNIELPM	PVAATP	ATPVVVAGAGAVVVAFAAGVAARTLANGGNIELPM	35	0	2	0
Streptomyces sp. CcalMP-8W	WP_018487273.1	C1	MPEFRQPGWTRGIAPLDEGAGGQVFGGASPVAATPAVVATAGAVVVAFAAGVAARHLANGGNVELPM	PVAATP	ATPAVVATAGAVVVAFAAGVAARHLANGGNVELPM	35	0	2	0	MNTSSTPAVLTATGALTESDPGAALPSLAPVTATPVVIVAALGAGFVAGYAAGRAAGNVELPM	PVTATP	ATPVVIVAALGAGFVAGYAAGRAAGNVELPM	31	0	1	0	MNMSPTPAALRGAGGLSESDPGRALSTLAPVAATPGVVAGVALGVALVNAFVAGYNHCGGNVELPM	PVAATP	ATPGVVAGVALGVALVNAFVAGYNHCGGNVELPM	34	0	1	1
Streptomyces sp. cf124.	SFM59885.1	C1	MSSIENALNSVEIPVEGVVYVAARPTLGTPRIARIGRIAQAAEGVGAIAAAATAAVGVAQAAEANNLAAEANAQNAAALAAVGGTPPAV	PTLGTP	GTPRIARIGRIAQAAEGVGAIAAAATAAVGVAQAAEANNLAAEANAQNAAALAAVGGTPPAV	62	0	3	0
Streptomyces sp. CNS606	WP_027763602.1	C1	MSRITESVIAVTPEKLDDGATTELGAMAPVQATPGFVAFGVGFAGGAGVAWLGVQAYEAGVND	PVQATP	ATPGFVAFGVGFAGGAGVAWLGVQAYEAGVND	32	0	1	0	MEQKIATFMNGQEFGSLENGFHETAPAPVMGTPVAAVATCWYVAGGVAGAGAVVGAYTWGVANG	PVMGTP	GTPVAAVATCWYVAGGVAGAGAVVGAYTWGVANG	34	0	3	1
Streptomyces sp. CNT318	WP_019357372.1	C1	MPITRESRAARWAQENAGEWCGHRVPEADEAVPVLTTPIFATFAVAGAAGAGLGAARVVGGITGHIVGAVPPPGSNEVSGYLEAGRPVKELLANHPAI	PVLTTP	TTPIFATFAVAGAAGAGLGAARVVGGITGHIVGAVPPPGSNEVSGYLEAGRPVKELLANHPAI	63	2	4	0
Streptomyces sp. GBA 94-10	ESP95595.1	C1	MTHIIESVRSITEPTLTEGQKDRLTRTMPVAFTPAVLVTTPYAGGGLAAGAAVVGAYELGRAAGGK	PVAFTP	FTPAVLVTTPYAGGGLAAGAAVVGAYELGRAAGGK	35	0	3	0	MNQQELGSLEDGLTKTDGTPVMATPAVAVPVTVKITAGIVAFTIPVGAYVAGRVVN	PVMATP	ATPAVAVPVTVKITAGIVAFTIPVGAYVAGRVVN	34	0	4	0
Streptomyces sp. HNM0039.	AWI29766.1	C1	MNRITESARKAASPTLSEVQSDKVVRMMPVAFTPSVVALCPYAAGGLAAGAAVVGAYEAGRAAG	PVAFTP	FTPSVVALCPYAAGGLAAGAAVVGAYEAGRAAG	33	1	1	1	MAEIAAFMNRQEMSPLEEGMAKTDGTPIMATPAAVAIPAGAKIAAAAVAFTIPVGAYVTGRVFG	PIMATP	ATPAAVAIPAGAKIAAAAVAFTIPVGAYVTGRVFG	35	0	3	0
Streptomyces sp. NRRL F-5527	WP_006132582.1	C1	MSRIVDSVVAVTPTDLTDDSQGEFGAMAPVQATPTLVAFGVGFAGGAGAAWVTVQAYEAGAND	PVQATP	ATPTLVAFGVGFAGGAGAAWVTVQAYEAGAND	32	0	3	0	MEQKIAAFMNEQDLGSLEQGYRDDAPMPVLATPAAAVATCWYVGGAAAGAAAVVGAYVTGRVVG	PVLATP	ATPAAAVATCWYVGGAAAGAAAVVGAYVTGRVVG	34	0	3	1
Streptomyces sp. NTH33.	WP_019435954.1	C1	Incomplete Sequence
Streptomyces sp. Or20	WP_097967157.1	C1	MSMSPTPAALRGTGGLSESDPGRALSSLAPVAATPGVVAGVAVGVALVNAFAAGYNHCGGNVELPM	PVAATP	ATPGVVAGVAVGVALVNAFAAGYNHCGGNVELPM	34	0	1	1	MNKSSAPAVLTATGALTESAPGVTLPTLAPVAATPVAIAATMGVAFVAGYAAGRAATGNVELPM	PVAATP	ATPVAIAATMGVAFVAGYAAGRAATGNVELPM	32	0	3	0	MPEFREPGWTRGIAPLQEGAGGQVFGGASPVAATPAVVATAGAVVVAFAAGVAARHLANGGNVELPM	PVAATP	ATPAVVATAGAVVVAFAAGVAARHLANGGNVELPM	35	0	2	0
Streptomyces sp. OspMP-M43 (Streptomyces sp. MnatMP-M77)	WP_093563033.1	C1	MSVVLDKVNASVEFGAIPGHISEAEWGNATDVPVLATPVTLTPTIGKVTLGVGAFTGGIAVGDALFG	PVLATP	ATPVTLTPTIGKVTLGVGAFTGGIAVGDALFG	32	0	6	0	MSTLLQKVNTSQELHAVASDLADAKDLSLTLPVLATITTVCPATGYIVGGGLFATGIGITYTVNR	PVLATI	ATITTVCPATGYIVGGGLFATGIGITYTVNR	31	0	7	1
Streptomyces sp. PT12	WP_113684789.1	C1	MSVAQLPADLAAMPGLREDDAGRPPASAMPVTHVLTSGQAACVTVAVAIAVGDTRPVLK	PASAMP	AMPVTHVLTSGQAACVTVAVAIAVGDTRPVLK	32	1	4	1	MSFARLPADLAAMPGLREDDAGLPPSTLVPVTSTSCAAASAVSAVVRAAAWVADAIGPVRPSA	PSTLVP	LVPVTSTSCAAASAVSAVVRAAAWVADAIGPVRPSA	36	5	2	1	MSVSQLPADLAAVSELKVGAAGQVKAAAQPVMATPTLAVAFVAGIGVGLAACQANGTTRPVAE	PVMATP	ATPTLAVAFVAGIGVGLAACQANGTTRPVAE	31	0	4	1	MNDQSRRLYDSPALASVAVDDARGWISARQKPVLATPSVLAGIAIGYAMLNAFEAGRSGGPIRPTS	PVLATP	ATPSVLAGIAIGYAMLNAFEAGRSGGPIRPTS	32	3	2	0		PVLATP	ATPSVLAGIAIGYAMLNAFEAGRSGGPIRPTS	32	3	2	0
Streptomyces sp. Root1295.	WP_056705459.1	C1	MPEFREPGWTRGIAPLQEDAGGQVFGGASPVAATPAVVATAGAVVVAFAAGVAARHLANGGNVELPM	PVAATP	ATPAVVATAGAVVVAFAAGVAARHLANGGNVELPM	35	0	2	0	MNKSSAPAVLTATGALTESAPGVTLPTLAPVAATPVAIAATMGVAFVAGYAAGRAATGNVELPM	PVAATP	ATPVAIAATMGVAFVAGYAAGRAATGNVELPM	32	0	3	0	MSMSPTPAALRGTGGLSESDPGRALSSLAPVAATPGVVAGVAVGVALVNAFAAGYNHCGGNVELPM	PVAATP	ATPGVVAGVAVGVALVNAFAAGYNHCGGNVELPM	34	0	1	1
Streptomyces sp. Root1319.	WP_056795351.1	C1	MNDTSFLTRPGALTDIRVDDPQGRVIINHPPVMATPAVVSGVIIGVALVNAFVAGRDGGPLEPPIEIDVPA	PVMATP	ATPAVVSGVIIGVALVNAFVAGRDGGPLEPPIEIDVPA	38	1	1	0
Streptomyces sp. S8.	ARI51158.1	C1	MPEFRQPGWTRGLAPLDEGAGGQVFGGASPVAATPAVVATAGAVVVAFAAGVAARHLANGGNVELPM	PVAATP	ATPAVVATAGAVVVAFAAGVAARHLANGGNVELPM	35	0	2	0	MNTSSTPAVLTATGALTESDPGATLPAIAPVAATPVVVVAALGAGFVAGYAAGRAAGNVELPM	PVAATP	ATPVVVVAALGAGFVAGYAAGRAAGNVELPM	31	0	1	0	MNMSPTPAALRGAGGLSESDPGRAHSTLVPVAATPGVLAGVAVGVALVNAFAAGYNHCGGNVELPM	PVAATP	ATPGVLAGVAVGVALVNAFAAGYNHCGGNVELPM	34	0	1	1
Streptomyces sp. SolWspMP-sol2th	WP_028419789.1	C1	MPEFRQPGWTRGIAPLDEGAGGQVFGGASPVAATPAVVATAGAVVVAFAAGVAARHLANGGNVELPM	PVAATP	ATPAVVATAGAVVVAFAAGVAARHLANGGNVELPM	35	0	2	0	MNTSSTPAVLTATGALTESDPGATLPAIAPVTATPVVIVAALGAGFVAGYAAGRAAGNVELPM	PVTATP	ATPVVIVAALGAGFVAGYAAGRAAGNVELPM	31	0	1	0	MNMSPTPAALRGAGGLSESDPGRALPTLAPVAATPAVVAGVAVGVALVNAFVAGYNHCGGNVELPM	PVAATP	ATPAVVAGVAVGVALVNAFVAGYNHCGGNVELPM	34	0	1	1
Streptomyces sp. SYSU K10008	WP_128380537.1	C1	Incomplete Sequence
Streptomyces sp. TLI_55	SNX62951.1	C1	MEQKIAAFMNEQDLGSLEQGYRDDAPMPVLATPAAAVATCWYVGGAAAGAAAVVGAYVTGRVVG	PVLATP	ATPAAAVATCWYVGGAAAGAAAVVGAYVTGRVVG	34	0	3	1	MSRIVDSVVAVTPAHLTDDSQGEFGAMAPVQATPTLVAFGVGFAGGAGAAWVTVQAYEAGAND	PVQATP	ATPTLVAFGVGFAGGAGAAWVTVQAYEAGAND	32	0	3	0
Streptomyces sp. TLI_55.	SNX62951.1	C1	MEQKIAAFMNEQDLGSLEQGYRDDAPMPVLATPAAAVATCWYVGGAAAGAAAVVGAYVTGRVVG	PVLATP	ATPAAAVATCWYVGGAAAGAAAVVGAYVTGRVVG	34	0	3	1	MSRIVDSVVAVTPAHLTDDSQGEFGAMAPVQATPTLVAFGVGFAGGAGAAWVTVQAYEAGAND	PVQATP	ATPTLVAFGVGFAGGAGAAWVTVQAYEAGAND	32	0	3	0
Streptomyces sp. W007	WP_007452032.1	C1	MSRIVDSVVAVTSQHLSDEAHGEFGVMMPVQATPTLIAFGVGFAGGAGAAWVTVQAYEAGAND	PVQATP	ATPTLIAFGVGFAGGAGAAWVTVQAYEAGAND	32	0	3	0	MEHKIAGFMNTQDLGTLEQGYQDDDAAPVLATPAAVATCWYVGGAVAGAGAVVGAYVTGRVNG	PVLATP	ATPAAVATCWYVGGAVAGAGAVVGAYVTGRVNG	33	0	3	1
Streptomyces sp. WM6372.	KOU14196.2	C1	MTEIVTFVNNLDLGTIQAGETRTDQAPVLATPAAALAAIGGAKAVGAFVGGATVVGGAYALGRAIG	PVLATP	ATPAAALAAIGGAKAVGAFVGGATVVGGAYALGRAIG	37	0	2	0	MNEVTALLDEMDIPEEGVVFPVAAPVLATPAAFMGGIAISCAVVSAFEAGRGNG	PVLATP	ATPAAFMGGIAISCAVVSAFEAGRGNG	27	2	1	1
Streptomyces sp. WMMB 322.	SCK38564.1	C1	MLEEKLNLQIQDQLHEGHEGEIAEEAAPVLATPALAGAFVGGAAVVTGAYAAGKAVG	PVLATP	ATPALAGAFVGGAAVVTGAYAAGKAVG	27	0	2	0	MKDVTSQINESAELASVDIADTEGVVFTDYTPVMGTPGAFLGGVAIASATVAAFEAGQG	PVMGTP	GTPGAFLGGVAIASATVAAFEAGQG	25	1	2	0
Streptomyces sp. WMMB 714.	SCK25358.1	C1	MLEAKLNLQIQDELHEGHDGEIAEEATPVLATPALAGAFVGGAAVVTGAYAAGKAVG	PVLATP	ATPALAGAFVGGAAVVTGAYAAGKAVG	27	0	2	0	MNDITSHINESAELAAVDAEGAIFADNTPVLATPGAFLGGVAIASATVAAFEAGQG	PVLATP	ATPGAFLGGVAIASATVAAFEAGQG	25	1	2	0
Streptomyces sp. WMMB 714.	WP_045864875.1	C1	MREIIVKAEPKLSESDKGQVVVPQGPVLATPVAAATVAFATGVAVTKAVG	PVLATP	ATPVAAATVAFATGVAVTKAVG	22	0	4	0
Streptomyces stelliscabiei.	KND26782.1	C1	MEIPVEGVVYVAARPTLGTPRIARVGNRLGGLAQAAEGVGAIGALATAAVGVGQAAEANNLAAEANAQNAAALAAVGGAPAA	PTLGTP	GTPRIARVGNRLGGLAQAAEGVGAIGALATAAVGVGQAAEANNLAAEANAQNAAALAAVGGAPAA	65	0	2	0
Streptomyces torulosus	WP_055713859.1	C1	MDIPVEAVILASARPTLGTPRIGRVSGANALNALAGLADLAQAAGGVASVVGAASAVEANNAAAEANQAVANAANAQAAAAGGVPA	PTLGTP	GTPRIGRVSGANALNALAGLADLAQAAGGVASVVGAASAVEANNAAAEANQAVANAANAQAAAAGGVPA	69	3	1	0
Streptomyces xiaopingdaonensis	WP_016907297.1	C1	MAVSRTTRIADWAQHHAEFGERHVPRSEEPLPVLLTPAIVFAGVTAAQTAAQVGLTAAAGALGYDDHGSTVPSTALDTGRSVGDTLAHHPQRF	PVLLTP	LTPAIVFAGVTAAQTAAQVGLTAAAGALGYDDHGSTVPSTALDTGRSVGDTLAHHPQRF	59	3	8	0
Streptomyces yanglinensis.	SEG54348.1	C1	Incomplete Sequence
Streptomyces yunnanensis.	WP_007452032.2	C1	MTEIVSFVNGLDLGAIETGEAHSDQAPVLATPAAALAAIGGAKAVGAFVGGATVVGGAYALGRAVG	PVLATP	ATPAAALAAIGGAKAVGAFVGGATVVGGAYALGRAVG	37	0	2	0	MIDVAAAANEMEIPEEGAIFAVATPVLATPAAFMGGIAISSAVVGAFEAGRNG	PVLATP	ATPAAFMGGIAISSAVVGAFEAGRNG	26	2	1	0
Tsukamurella tyrosinosolvens.	WP_074850816.1	C1	MTEMISKVNRSAVLAGTPVDLDRPAYVGATAPVTSVGFAAGGGGGVDVAGMGGDANFAAAAGAF	VLAGTP	GTPVDLDRPAYVGATAPVTSVGFAAGGGGGVDVAGMGGDANFAAAAGAF	49	1	3	0
Yuhushiella deserti.	SFQ42856.1	C1	MLEEKLNIQAEEFGKLDENHAGRIAEAATPVLATPALAGAFVAGAGVVTGAYAAGKAVG	PVLATP	ATPALAGAFVAGAGVVTGAYAAGKAVG	27	0	2	0	MESTMDQLVARLNTSPDLASVEVSSTEGAVFPGASPVLGTPGAFLGGVAIASATVAAFEAGRG	PVLGTP	GTPGAFLGGVAIASATVAAFEAGRG	25	1	2	0
Actinomyces sp. 2129	WP_119835997.1	C2	MPILLDKVNSDPALKEMLQLRASRSEAPVLATPAALAWAAGAALGGGSVGGAAYAAYRAVAN	PVLATP	ATPAALAWAAGAALGGGSVGGAAYAAYRAVAN	32	1	1	0
Actinomyces sp. 299	WP_127841861.1	C2	MQILLDKVNSDPTLKGSLRLRASRVGTPVLATPAALAWAAGAAVGAGAVSGAAYGAYRVAAR	PVLATP	ATPAALAWAAGAAVGAGAVSGAAYGAYRVAAR	32	1	1	0
Actinopolyspora alba.	SFE63470.1	C2	MNRIESVANVQLPDAHDGAVRSLDTTGSTAPVLTAAAITAAAVVCFAAGVASDAVESGSGSYAASTGQDPTGMSSGELLQRRTALLG							MNRIENAATQQVTASAGAIEPMDSVEGVSPVLTAAVAAGAVAATAAAFAAGNMVTDYVGAGYTAKHDGSELSGMSVGDLVNSRREAMSH
Actinopolyspora mzabensis.	SDK49484.1	C2	MNRIESVANVQVPEAHAGAVRTLDTTGSTAPVLTAAAITAAAVVSFAAGVASDAVESGSGSYAASTGQDPTGMSSGELLQRRTALLG
Amycolatopsis antarctica.	OZM72834.1	C2	MSNVEAFANENADGVLNPLQVTTALGPVLATPAYAAYTAGAAAVFTAGLISDSVEDHHAAEVTPTGPVPAYGSVDELLGMRISSIN	PVLATP	ATPAYAAYTAGAAAVFTAGLISDSVEDHHAAEVTPTGPVPAYGSVDELLGMRISSIN	57	5	5	0	MNGIEKAAQVAFQKTEGVLRPFERVSGNAPVLATPAAAAVVASATALYAAGNMVTDLVGQESAVKNPGINLAGRSGAELLNIRAEGLRG	PVLATP	ATPAAAAVVASATALYAAGNMVTDLVGQESAVKNPGINLAGRSGAELLNIRAEGLRG	57	3	3	0
Amycolatopsis marina	WP_091675004.1	C2	MSNVEAFANQNADGVLNPLQVTSAVGPVLATPAYAGYAAGAGVVFTLGLISDAVEDHHADEVSPTGPVPSYGSVDELLGMRVASIN	PVLATP	ATPAYAGYAAGAGVVFTLGLISDAVEDHHADEVSPTGPVPSYGSVDELLGMRVASIN	57	5	3	0	MNGIERAAQAAVPENGGTLRPLERANGTAPVLGTPALVTAAGVLYVAGNMVTDLVGQETASTGKVRGLSGKSGAELLNIRAAGLRE	PVLGTP	GTPALVTAAGVLYVAGNMVTDLVGQETASTGKVRGLSGKSGAELLNIRAAGLRE	54	3	5	0
Amycolatopsis palatopharyngis	WP_116048513.1	C2	MNGIERAAQAAVPENGGALRPLERANGTAPVLGTPALVTAAGVLYVAGNMVTDLVGQETAANSKMRGLSGKSGAELLSIRTAGLRE	PVLGTP	GTPALVTAAGVLYVAGNMVTDLVGQETAANSKMRGLSGKSGAELLSIRTAGLRE	54	4	5	0	MSNVEAFANQNVDGVLNPLQVTSAVGPVLATPAYAGYAAGAGVVFTLGLISDAVEDHHADEVSPTGPVPSYGSVDELLGMRVASIS	PVLATP	ATPAYAGYAAGAGVVFTLGLISDAVEDHHADEVSPTGPVPSYGSVDELLGMRVASIS	57	6	3	0
Amycolatopsis sp. H5.	OXM68434.1	C2	MNRIECAAAKSTLEALEINHEIAAPVLTPVLVTVTVAGFAGGAAVGYVQCARHGCIDESGDGIRMTDIREMSVSELLQARQDAAVA	PVLTP	TPVLVTVTVAGFAGGAAVGYVQCARHGCIDESGDGIRMTDIREMSVSELLQARQDAAVA	59	3	4	2	MNRIELAAEKLAGSMVPLQEVTPEQPVVCTPVVTAGFAAFGIGYYVAKAFGPSEEASAEASGAGIEAMSGNDLIQFRRTEVSA	PVVCTP	CTPVVTAGFAAFGIGYYVAKAFGPSEEASAEASGAGIEAMSGNDLIQFRRTEVSA	55	5	3	1
Amycolatopsis tolypomycina.	SEC50939.1	C2	MNRIEETVRTLGADLGLEPLDATVVHTPVLCATLVDAAVGAGAFAARATRHAIVETPGRRAFATFDQGVLHNPRHEVNTASLHGLTDALPCGSLLGIANG	PVLCAT	CATLVDAAVGAGAFAARATRHAIVETPGRRAFATFDQGVLHNPRHEVNTASLHGLTDALPCGSLLGIANG	70	2	6	2
Brevibacterium sandarakinum.	SDS21265.1	C2	MQNRITRFADSAEITRIGRNIDAQPVLATPVTTTATTAVTCITAAFGSHDSERNDVTSSFESDETVDGLLKARVVAMSS (reverse direction)	PVLATP	ATPVTTTATTAVTCITAAFGSHDSERNDVTSSFESDETVDGLLKARVVAMSS	52	7	10	1
Clavibacter tessellarius	WP_094126554.1	C2	MSATHRLLGLVNSDDVRVDGVTSPVMATPAAFAAGVVAGGKATAVVVGAAGVGAAVGNAVGGG	PVMATP	ATPAAFAAGVVAGGKATAVVVGAAGVGAAVGNAVGGG	37	0	2	0
Corynebacterium propinquum	Not Annotated	C2	MSRLSTLVNNDQITLEQVHSPVMATPAAFGAGVVAGAKACGALVAAAGVGAAIATATKE	PVMATP	ATPAAFGAGVVAGAKACGALVAAAGVGAAIATATKE	36	0	3	1
Corynebacterium sp. HMSC22B11.（Corynebacterium diphtheriae subsp. lausannense）	Not Annotated	C2	MSRLSTLVNNDQITLEQVHSPVMATPAAFGAGVVAGAKACGALVAAAGVGAAIASATKK	PVMATP	ATPAAFGAGVVAGAKACGALVAAAGVGAAIASATKK	36	1	2	1
Corynebacterium striatum	WP_080969964.1	C2	MLATAVNSAQDRGLIPADRDGFLAIGSAPMTCTPTVTVRITVRIMRAVTRKQRGAEPAATDHKETLVAV	PMTCTP	CTPTVTVRITVRIMRAVTRKQRGAEPAATDHKETLVAV	38	0	7	1
Corynebacterium timonense.	WP_019193626.1	C2	Incomplete Sequence
Kocuria sp. WRN011.	PBB07536.1	C2	MSVLQAVNVEPRLRGDIESGPLSYSDAPVLACPLAAVGAAGVAKAAGVVVGGGAVTGVAYVAYKTVAN	PVLACP	ACPLAAVGAAGVAKAAGVVVGGGAVTGVAYVAYKTVAN	38	0	2	1	MQPTAKLLEHVNHTEISIHERQGVPVLATPAAFGAGVVLGAKVSAGGIAVAGGGAALCTATVLGCGN	PVLATP	ATPAAFGAGVVLGAKVSAGGIAVAGGGAALCTATVLGCGN	40	1	3	2
Micromonospora endolithica	WP_120729387.1	C2	MEAAAERDIPAVGEGVLEPLELVGVAAPVLTPFAVGVAVGAGLYAYHKWGGAEETPTGYRLDSETADQMTVSELVQSRRQAVTR	PVLLTP	LTPFAVGVAVGAGLYAYHKWGGAEETPTGYRLDSETADQMTVSELVQSRRQAVTR	55	3	6	0	MNRIETVAQNLLPEADTTYLRPLESVEATVPTLTCPCVAGFILGVGAGYQFMQAVFNGPDAGYGAFTGVRGNFADMPVDELVATRQAAVGGLS	PTLTCP	TCPCVAGFILGVGAGYQFMQAVFNGPDAGYGAFTGVRGNFADMPVDELVATRQAAVGGLS	60	1	3	2
Mycetocola reblochoni REB411.	SJN40166.1	C2	Incomplete Sequence
Prauserella rugosa	WP_084705757.1	C2	MSNVEAFANQHADNVLSPLEVTSAVGPVLATPAYAGYTAAAAAVFTAGLISDAVEHHGSDKVTPTGPVPNYGSVGDLLDMRVSSIN	PVLATP	ATPAYAGYTAAAAAVFTAGLISDAVEHHGSDKVTPTGPVPNYGSVGDLLDMRVSSIN	57	5	5	0
Prauserella sp. Am3.	KID32051.1	C2	MSNVEAFANQHADNVLSPLEVTSAVGPVLATPAYAGYTAAAAAVFTAGLISDAVEHHGSXKVTPTGPVPNYGSVGDLLDMRVSSIN	PVLATP	ATPAYAGYTAAAAAVFTAGLISDAVEHHGSXKVTPTGPVPNYGSVGDLLDMRVSSIN	57	5	5	0
Saccharomonospora glauca K62.	WP_005463312.1	C2	MKMNNIEKAAQAALPEQGGVLRPLERANGAAPVLGTPALVTATGVFFVAGNMVLDLVGHESAAKHDGAVPTGKSGAELLSMRANGLRG	PVLGTP	GTPALVTATGVFFVAGNMVLDLVGHESAAKHDGAVPTGKSGAELLSMRANGLRG	54	3	4	0
Saccharomonospora halophila 8	WP_019806229.1	C2	Incomplete Sequence
Saccharomonospora sp. LRS4.154.	OQO91993.1	C2	Incomplete Sequence
Streptomyces abyssalis.	WP_070011839.1	C2	MLLEKVNNSHLLEAVSMDVANVEDLSSAEPVLSTPAAAAGGALVTAGAFGAGVGLGVTQAQADG	PVLSTP	STPAAAAGGALVTAGAFGAGVGLGVTQAQADG	32	1	3	0
Streptomyces atratus.	SFX78226.1	C2	Incomplete Sequence
Streptomyces globosus	WP_114059196.1	C2	MSVLIEKVNAGAARAAESPVAPVMATPAAFTVGFVGGAKATAIIVAAAGVGAAVKACQK	PVMATP	ATPAAFTVGFVGGAKATAIIVAAAGVGAAVKACQK	35	0	3	1	MLIQKVNLNPAVNGELHAGSPAGAAAPVMATPAIIATPVIAKTAGYVVGGAVVTGAAAVAYKTATG	PVMATP	ATPAIIATPVIAKTAGYVVGGAVVTGAAAVAYKTATG	37	0	6	0	MLLHKVNQNASLTGSLSQRTLEGAVSPVMATPSLVFTPCAGKAAVLVTAAAVGYATAKVK	PVMATP	ATPSLVFTPCAGKAAVLVTAAAVGYATAKVK	31	1	4	1
Streptomyces katrae	WP_094191850.1	C2	MAKIAAFMNEQEMGPITESVVNRDGTPVMATPAAVVAVPASVKITAAVVAFTVPVGAYVAGRVVN	PVMATP	ATPAAVVAVPASVKITAAVVAFTVPVGAYVAGRVVN	36	1	3	0	MNRITESVRGIADAALSEDTGERTSRMMPVAFTPAVLVVCPYAAGGLAAGAAAVGAYEAGRAAAKG	PVAFTP	FTPAVLVVCPYAAGGLAAGAAAVGAYEAGRAAAKG	35	0	1	1
Streptomyces nanshensis.	Not Annotated	C2	MLLEKVNNSHLLEAVSMDAANVEDLSSAEPVLSTPAAAAGGALVTAGAFGAGVGLGVTQAQADG	PVLSTP	STPAAAAGGALVTAGAFGAGVGLGVTQAQADG	32	1	3	0	MTAISIKVNASQELDGVSIHAGENEWNGRMSPVLATPAAVGAGLAGAAAVAGAGAAGIAVGNAAGQAAGG	PVLATP	ATPAAVGAGLAGAAAVAGAGAAGIAVGNAAGQAAGG	36	0	1	0
Streptomyces peucetius subsp. caesius ATCC 27952.	ATW49598.1	C2	MFLNKVNQDVSLEDFVAERGPEARIAPIMATPAIFTPAAVKVGVSAGAAAAAYMATKVK	PIMATP	ATPAIFTPAAVKVGVSAGAAAAAYMATKVK	30	1	3	0	MLTHKVNADASLKGALMAGAPARGTAPVMATPAIFATPVIAKAAGAVVGAGAVTGAAYAAYKTATG	PVMATP	ATPAIFATPVIAKAAGAVVGAGAVTGAAYAAYKTATG	37	0	5	0	MSVLVEKVNAGAGHAADGSIAPVMATPAAFVAGVVAGGKVSAVITAAAGVGAAVKACQK	PVMATP	ATPAAFVAGVVAGGKVSAVITAAAGVGAAVKACQK	35	1	2	1
Streptomyces radiopugnans.	SEQ27555.1	C2	MSVLVEKVNAGVGRPVEDEAAPVMATPAAFAAGVVAGAKASAILVAAAGVGAAVANAQK	PVMATP	ATPAAFAAGVVAGAKASAILVAAAGVGAAVANAQK	35	1	1	0	MLIRKVNADTSLRGTLEPGSPLGGAAPVMATPALIATPVIAKAAGAVVGAGAVTGAAYVAYKTATG	PVMATP	ATPALIATPVIAKAAGAVVGAGAVTGAAYVAYKTATG	37	0	5	0
Streptomyces regensis.	KMS87533.1	C2	MSNVEAFANQHADNVLSPLEVTSAVGPVLATPAYAGYTAAAAAVFTAGLISDAVEHHGSDKVTPTGPVPNYGSVGDLLDMRVSSIN	PVLATP	ATPAYAGYTAAAAAVFTAGLISDAVEHHGSDKVTPTGPVPNYGSVGDLLDMRVSSIN	57	5	5	0
Streptomyces sp. CB03234.	WP_073756735.1	C2	MLLDKVNQDVSLAGFVAEHGPGARIAPVMATPAIFTPAAVKVGACVGAAVATYVATKAVK	PVMATP	ATPAIFTPAAVKVGACVGAAVATYVATKAVK	31	0	4	1	MLTQKVNADASLKGALDAGAPARGTAPVMATPAIFATPVIAKAAGAVVGAGAVTGAAYAAYKVATG	PVMATP	ATPAIFATPVIAKAAGAVVGAGAVTGAAYAAYKVATG	37	0	4	0	MSVLVEKVNAGAGQAADGSVAPVMATPAAFVAGVVAGGKVSAVITAAAGVGAAVKAAQK	PVMATP	ATPAAFVAGVVAGGKVSAVITAAAGVGAAVKAAQK	35	1	2	0
Streptomyces sp. CB03238.	NOT Annotated	C2	MLLDKVNQDVSLAGFVAEHGPGARIAPVMATPAIFTPAAVKAGACVGVAVATYMATKAVK	PVMATP	ATPAIFTPAAVKAGACVGVAVATYMATKAVK	31	0	4	1	MLTQKVNADASLKGALEAGAPARGTAPVMATPAIFATPVIAKAAGAVVGAGAVTGAAYAAYKVATG	PVMATP	ATPAIFATPVIAKAAGAVVGAGAVTGAAYAAYKVATG	37	0	4	0	MSVLVEKVNAGAGQAADGSVAPVMATPAAFVAGVVAGGKVSAVMTAAAGVGAAVKAAQK	PVMATP	ATPAAFVAGVVAGGKVSAVMTAAAGVGAAVKAAQK	35	1	2	0
Streptomyces sp. NRRL F-5630	WP_051703648.1	C2	MLTQKVNANPSLQGALEAGAPMGGAAPVMATPALIATPVIAKAAGAVVGAGAVTGAAYAAYKVATG	PVMATP	ATPALIATPVIAKAAGAVVGAGAVTGAAYAAYKVATG	37	0	4	0	MSVLLDKVNAGVGQASDVQIAPVMATPAAFVAGVVAGGKVCAVLTAAAGVGAAVKSAQK	PVMATP	ATPAAFVAGVVAGGKVCAVLTAAAGVGAAVKSAQK	35	1	2	1
Streptomyces sp. NRRL S-1448	WP_037808412.1	C2	MTELITQVNESEVLTETAISADEGRVFPGATPVLATPAAFLGGVAVSCAVVGAFEAGRG	PVLATP	ATPAAFLGGVAVSCAVVGAFEAGRG	25	1	1	1
Streptomyces sp. Root1310.	KQX65274.1	C2	MDSLTSIVNHDERLDALHIASTQTEILSETTVPVLGTPAALAASVAVATAIHSIW	PVLGTP	GTPAALAASVAVATAIHSIW	20	2	2	0
Streptomyces sp. TAA486	WP_051345488.1	C2	MLLEKVNNSHLLDTVLTDAANAEDLSPAEPVLSTPAAVAGGALVTAGAFGAGVGLGVTQAQAG	PVLSTP	STPAAVAGGALVTAGAFGAGVGLGVTQAQAG	31	1	3	0	MTAVSTKVNASQELNGVSIHAGENEWNGRMSPVLATPAAVGAGLAGAAAIAGAAAGGIAVGNAAGQAAGG	PVLATP	ATPAAVGAGLAGAAAIAGAAAGGIAVGNAAGQAAGG	36	0	1	0
Streptomyces sp. TRM SA0054.	PJE97627.1	C2	MLTQKVNANTSLTGALEPGTPLGGAAPVMATPALIATPAIAKAAGAVVGAGAVTGAAYAAYRAVIN	PVMATP	ATPALIATPAIAKAAGAVVGAGAVTGAAYAAYRAVIN	37	0	3	0	MSVLVEKVNSGAGRRTEDPVAPVMATPAAFVAGVVAGAKAAGALVAAAGVGAAVGAAVKK	PVMATP	ATPAAFVAGVVAGAKAAGALVAAAGVGAAVGAAVKK	36	0	1	0
Streptomyces sp. WMMB 322.	SCK46720.1	C2	MLLEKVNNSHLLEAVPMDAANVEDLSSAEPVLSTPAAAAGGALVTAGAFGAGVGLGVTQAQADG	PVLSTP	STPAAAAGGALVTAGAFGAGVGLGVTQAQADG	32	1	3	0	MTAISTKVNASQELDGVSIHAGENEWNGRMSPVLATPAAVGAGLAGAAAVAGAGAAGIAVGNAAGQAAGG	PVLATP	ATPAAVGAGLAGAAAVAGAGAAGIAVGNAAGQAAGG	36	0	1	0
Streptomyces sp. YIM 130001	RII13760.1	C2	MLLEKVNENEALAGELTADGPVAYNVPVMATPALIATPVIAKAAGAVVGAGAVGGAAYGAYRAVVN	PVMATP	ATPALIATPVIAKAAGAVVGAGAVGGAAYGAYRAVVN	37	0	2	0	MSIMLERINAGEGEMTEQSIAPVMATPAAFVAGAVAGAKVSGALVAAAAGGAAVGAAVKK	PVMATP	ATPAAFVAGAVAGAKVSGALVAAAAGGAAVGAAVKK	36	1	1	0
Streptomyces xiamenensis.	AKG45483.1	C2	MAGPSLARQWAHLGPLHENSPGEVGRAASPVLATPSAFAAGMGIVVGAYVVGRMIGSETEPVIQ	PVLATP	ATPSAFAAGMGIVVGAYVVGRMIGSETEPVIQ	32	2	2	0	MTAADRVPALRDLSPLTENSPGQAPGSATAVLATPTPAAMIVIAYAAFEVGRMVCGTTEPVIQ	AVLATP	ATPTPAAMIVIAYAAFEVGRMVCGTTEPVIQ	31	0	4	1	MTGQEGHRIPMSRIAAYLDDSPVLATIPVLDRTGRVSPARPVLATPVTIVAFGAGVAAGSAIVAAFEAGRTAGSSTEPIMT	PVLATP	ATPVTIVAFGAGVAAGSAIVAAFEAGRTAGSSTEPIMT	38	3	5	0

## Sheet: Linaridin modification analysis
Type	LinA Candidate	Cleavage-site	Core	Core Length	Ser in Core	Thr in Core	Cys in Core	Cys at C-term	Dethiolation	Dehydration	AviCys	Modification	Index	Ala	Gly	Val	Leu	Ile	GAVLI	Hydrophobicity
A1	MDTEVMDVQNFANSAMGSAEAGLKTDASAPAMTTPTAVQFVIQGSTICLIC	PAMTTP	TTPTAVQFVIQGSTICLIC	19	1	4	2	1	1	4	1	6	0.315789	1	1	2	1	3	8	0.421053
A1	MDTEVMDVQNFANSAMGSAEAGLKADASAPAMTTPTAVQFVIQGSTICLIC	PAMTTP	TTPTAVQFVIQGSTICLIC	19	1	4	2	1	1	4	1	6	0.315789	1	1	2	1	3	8	0.421053
A1	MRLDSIATQETATALPESMATQDFANSVLAGAVPGFHSDAETPAMATPAVAQFVIQGSTICLVC	PAMATP	ATPAVAQFVIQGSTICLVC	19	1	2	2	1	1	2	1	4	0.210526	3	1	3	1	2	10	0.526316
A1	MRLDSIATQETATALPESMATQDFANSVLAGAVPGFHSDAETPAMATPAVAQFVIQGSTICLVC	PAMATP	ATPAVAQFVIQGSTICLVC	19	1	2	2	1	1	2	1	4	0.210526	3	1	3	1	2	10	0.526316
A1	MRLDSIATQETATALPESMATQDFANSVLAGAVPGFHSDAETPAMATPAVAQFVIQGSTICLVC	PAMATP	ATPAVAQFVIQGSTICLVC	19	1	2	2	1	1	2	1	4	0.210526	3	1	3	1	2	10	0.526316
A1	MRLDSIATQETATALPESMATQDFANSVLAGAVPGFHSDAETPAMATPAVAQFVIQGSTICLVC	PAMATP	ATPAVAQFVIQGSTICLVC	19	1	2	2	1	1	2	1	4	0.210526	3	1	3	1	2	10	0.526316
A1	MRLDSIATQETATALPESMATQDFANSVLAGAVPGFHSDAETPAMATPAVAQFVIQGSTICLVC	PAMATP	ATPAVAQFVIQGSTICLVC	19	1	2	2	1	1	2	1	4	0.210526	3	1	3	1	2	10	0.526316
A1	MNSEVLEVQAFANTALSSAEAGARADASIPAMTTPTIVAAAEFVVAGSTICLIC	PAMTTP	TTPTIVAAAEFVVAGSTICLIC	22	1	4	2	1	1	4	1	6	0.272727	4	1	3	1	3	12	0.545455
A1	MNSEVLEVQAFANTALSSAEAGARADASIPAMTTPTIVAAAEFVVAGSTICLIC	PAMTTP	TTPTIVAAAEFVVAGSTICLIC	22	1	4	2	1	1	4	1	6	0.272727	4	1	3	1	3	12	0.545455
A1	MNSEVLEVQAFANAALSSAEAGARADASIPAMTTPTIVAAAEFVVAGSTICLIC	PAMTTP	TTPTIVAAAEFVVAGSTICLIC	22	1	4	2	1	1	4	1	6	0.272727	4	1	3	1	3	12	0.545455
A1	MNSEVLEVQAFANAALSSAEAGARADASIPAMTTPTIVAAAEFVVAGSTICLIC	PAMTTP	TTPTIVAAAEFVVAGSTICLIC	22	1	4	2	1	1	4	1	6	0.272727	4	1	3	1	3	12	0.545455
A1	MQSEVLEVQEFANQMMRHAEPGMRGDASNPAMTTPAFVTAAQFVIQGSTICLIC	PAMTTP	TTPAFVTAAQFVIQGSTICLIC	22	1	4	2	1	1	4	1	6	0.272727	3	1	2	1	3	10	0.454545
A1	MNSEVLEVQTFANAALSSVEAGARTDGSIPAMTTPTVVVATEYVVAGSTVCLIC	PAMTTP	TTPTVVVATEYVVAGSTVCLIC	22	1	5	2	1	1	5	1	7	0.318182	2	1	6	1	1	11	0.5
A1	MRSELTATRPDSADIRPEALAAQDFANTVLSGSAPGFHSDCETPAMATPATPTAAQFVIQGSTICLVC	PAMATP	ATPATPTAAQFVIQGSTICLVC	22	1	4	2	1	1	4	1	6	0.272727	4	1	2	1	2	10	0.454545
A1	MTRQDSTAVHPEVLAAQDFANTVLEGAAPGFHSNCETPAMATPATPTVAQFVIQGSTICLVC	PAMATP	ATPATPTVAQFVIQGSTICLVC	22	1	4	2	1	1	4	1	6	0.272727	3	1	3	1	2	10	0.454545
A1	MTRPDSAIRPEALAAQEFANTVLSGAAPGFHADCETPAMATPATPTAAQFVIQGSTICLVC	PAMATP	ATPATPTAAQFVIQGSTICLVC	22	1	4	2	1	1	4	1	6	0.272727	4	1	2	1	2	10	0.454545
A1	MTRPDSAIRPEALAAQEFANTVLSGAAPGFHADCETPAMATPATPTAAQFVIQGSTICLVC	PAMATP	ATPATPTAAQFVIQGSTICLVC	22	1	4	2	1	1	4	1	6	0.272727	4	1	2	1	2	10	0.454545
A1	MRLNSIAAQEKDTGIRPESIATQEFANGVLRDAAPGFHSDSEIPAMATPATPTAAQFVIQGSTICLVC	PAMATP	ATPATPTAAQFVIQGSTICLVC	22	1	4	2	1	1	4	1	6	0.272727	4	1	2	1	2	10	0.454545
A1	MTLTSSNSAEALAAQDFANTVLSAAGPGFHADCETPAMATPATPTVAQFVVQGSTICLVC	PAMATP	ATPATPTVAQFVVQGSTICLVC	22	1	4	2	1	1	4	1	6	0.272727	3	1	4	1	1	10	0.454545
A1	MRLNSIAAQEKDTGIRPESIATQEFANGVLRDAAPGFHSDSEIPAMATPATPTAAQFVIQGSTICLVC	PAMATP	ATPATPTAAQFVIQGSTICLVC	22	1	4	2	1	1	4	1	6	0.272727	4	1	2	1	2	10	0.454545
A1	MRSEMTLTSTNSAEALAAQDFANTVLSAAAPGFHADCETPAMATPATPTVAQFVIQGSTICLVC	PAMATP	ATPATPTVAQFVIQGSTICLVC	22	1	4	2	1	1	4	1	6	0.272727	3	1	3	1	2	10	0.454545
A1	MTDPDTVSPESVATQEFANSVLAGAAPGFYSDSDVPAMATPATPTAAQFVVQGSTICLVC	PAMATP	ATPATPTAAQFVVQGSTICLVC	22	1	4	2	1	1	4	1	6	0.272727	4	1	3	1	1	10	0.454545
A1	MSIEIDIVQQFANETFKEATPGFVTAAETPAMATPGVTPATPHAAQYVVQGSTICLIC	PAMATP	ATPGVTPATPHAAQYVVQGSTICLIC	26	1	4	2	1	1	4	1	6	0.230769	4	2	3	1	2	12	0.461538
A2	MSSTLVQTPSVEDSVNAMFSHIDQGFVNAHNEPAMTTPSAIVTQTLVVGSTICLVC	PAMTTP	TTPSAIVTQTLVVGSTICLVC	21	2	5	2	1	1	6	1	8	0.380952	1	1	4	2	2	10	0.47619
A2	MSSILVEPSVEDSVNARFSSVDQGFINAHNEPAMTTPSAIVTQTLVVGSTICLIC	PAMTTP	TTPSAIVTQTLVVGSTICLIC	21	2	5	2	1	1	6	1	8	0.380952	1	1	3	2	3	10	0.47619
A2	MSTTLTASRALEAEVNAIFGDVEAGFAETSEMPVMTTPMIVPAATMVIQGSTICLVC	PVMTTP	TTPMIVPAATMVIQGSTICLVC	22	1	4	2	1	1	4	1	6	0.272727	2	1	3	1	3	10	0.454545
A2	MEINMSTTLIASRALEAEVNAIFGDVEAGFAETSEMPVMTTPMIVPAATMVIQGSTICLVC	PVMTTP	TTPMIVPAATMVIQGSTICLVC	22	1	4	2	1	1	4	1	6	0.272727	2	1	3	1	3	10	0.454545
A2	MTSEVLEVQTFANSALWSVEAGAQTDGSIPAMTTPTVVVATEYVVAGSTICLIC	PAMTTP	TTPTVVVATEYVVAGSTICLIC	22	1	5	2	1	1	5	1	7	0.318182	2	1	5	1	2	11	0.5
A2	VNATESRVEFVTDAVNASFAEAQEGFVNAHNAPAMTTPTIIAVCEVVVTGSTICLGC	PAMTTP	TTPTIIAVCEVVVTGSTICLGC	22	1	5	3	1	2	5	1	8	0.363636	1	2	4	1	3	11	0.5
A2	MAQANTLAPDSSIAQAVNEVFADVQAGFVNRHNEPAMTTPAIVYEAAVTVVAGSTICLIC	PAMTTP	TTPAIVYEAAVTVVAGSTICLIC	23	1	4	2	1	1	4	1	6	0.26087	4	1	4	1	3	13	0.565217
A2	MNVSDLANSIEIDTTPGAADYAMNSAQPSMTTPAGVYAVAEMAVAGSTICLVC	PSMTTP	TTPAGVYAVAEMAVAGSTICLVC	23	1	3	2	1	1	3	1	5	0.217391	5	2	4	1	1	13	0.565217
A2	MSDLGIAPTVEQLEKVANREFSGISEGFVNSHNLPTMTTPVTPATPGALEVVVTGSTICLGC	PTMATP	TTPVTPATPGALEVVVTGSTICLGC	25	1	6	2	1	1	6	1	8	0.32	2	3	4	2	1	12	0.48
B	MSIVAQFANESLTDVTPGVLSGTATLGLNTPADPVMATPVLAFEVFLIATEMLYDNVQNYTNS	PVMATP	ATPVLAFEVFLIATEMLYDNVQNYTNS	27	1	3	0	0	0	3	0	3	0.111111	3	0	3	3	1	10	0.37037
B	MSLVAQFANESLTDVSPGMLSETDAAARLDTPADPVMATPLIVETVFLATGMLAANIANYVDRNNY	PVMATP	ATPLIVETVFLATGMLAANIANYVDRNNY	29	0	3	0	0	0	3	0	3	0.103448	5	1	3	3	2	14	0.482759
B	MSPVAQFANASLTDVSPGMLTGIDAARLDSPADPVMATPLITAVFAVATDMLTQNIANYVNRNAH	PVMATP	ATPLITAVFAVATDMLTQNIANYVNRNAH	29	0	4	0	0	0	4	0	4	0.137931	6	0	3	2	2	13	0.448276
B	MLSGIDAARLDSPADPVMATPLITAVFAVATDMLAQNIANYVNRNAH	PVMATP	ATPLITAVFAVATDMLAQNIANYVNRNAH	29	0	3	0	0	0	3	0	3	0.103448	7	0	3	2	2	14	0.482759
B	MSVVANFANTELADVTPGRIGNDATPTMLTPLAALATPEGVAVTSATAYALHEVTKDIQR	PTMLTP	LTPLAALATPEGVAVTSATAYALHEVTKDIQR	32	1	5	0	0	0	5	0	5	0.15625	7	1	3	4	1	16	0.5
B	MSVVADFANAELTDVTPGRMGNDATPTMLTPLATLATPEGVAVTSATAYALNEITNDLAG	PTMLTP	LTPLATLATPEGVAVTSATAYALNEITNDLAG	32	1	6	0	0	0	6	0	6	0.1875	7	2	2	5	1	17	0.53125
B	MSIVADFANTELVDVEPGRIGNDATPTMLTPLATLATPEGVAVTSATAYALHEVTKDIQR	PTMLTP	LTPLATLATPEGVAVTSATAYALHEVTKDIQR	32	1	6	0	0	0	6	0	6	0.1875	6	1	3	4	1	15	0.46875
B	MSVVANFANTELADVNPGRIGNDATPTMLTPLAALATPEGVAVTSATAYALHEVTKDIQR	PTMLTP	LTPLAALATPEGVAVTSATAYALHEVTKDIQR	32	1	5	0	0	0	5	0	5	0.15625	7	1	3	4	1	16	0.5
B	MSVVANFANTELADVNPGRIGNDATPTMLTPLAALATPEGVAVTSATAYALHEVTKDIQR	PTMLTP	LTPLAALATPEGVAVTSATAYALHEVTKDIQR	32	1	5	0	0	0	5	0	5	0.15625	7	1	3	4	1	16	0.5
B	MSVVANFANTELADVNPGRIGNDATPTMLTPLAALATPEGVAVTSATAYALHEVTKDIQR	PTMLTP	LTPLAALATPEGVAVTSATAYALHEVTKDIQR	32	1	5	0	0	0	5	0	5	0.15625	7	1	3	4	1	16	0.5
B	MSVVANFANTELADVNPGRIGNDATPTMLTPLAALATPEGVAVTSATAYALHEVTKDIQR	PTMLTP	LTPLAALATPEGVAVTSATAYALHEVTKDIQR	32	1	5	0	0	0	5	0	5	0.15625	7	1	3	4	1	16	0.5
B	MSVVADFANTELTDVTPGRMGNDATPTMLTPLATLATPEGVAVTSATAYALNEITNDLAG	PTMLTP	LTPLATLATPEGVAVTSATAYALNEITNDLAG	32	1	6	0	0	0	6	0	6	0.1875	7	2	2	5	1	17	0.53125
B	MSVVADFANTELADVTPGRIGNDATPTMLTPLAALATPEGVAVTAATAYALNEVTNDLAG	PTMLTP	LTPLAALATPEGVAVTAATAYALNEVTNDLAG	32	0	5	0	0	0	5	0	5	0.15625	9	2	3	5	0	19	0.59375
B	MSVVAEFANASLADVTPGPLMGTEAGLSSDAAPVLCTPAATIACPEGWAILVAVADAVWNVTQEITQG	PVLCTP	CTPAATIACPEGWAILVAVADAVWNVTQEITQG	33	0	4	2	0	2	4	0	6	0.181818	7	2	4	1	3	17	0.515152
B	MSILADFANAELTDVKPGRIGADSTPTMVTPLATIATPEATPVGFAATSATAVALDKVTHNIG	PTMVTP	VTPLATIATPEATPVGFAATSATAVALDKVTHNIG	35	1	7	0	0	0	7	0	7	0.2	8	2	4	2	2	18	0.514286
B	MSILADFANAELADVKPGRIGADSTPTMVTPLATIATPEATPVGFAATSATAVALDKVTHNVG	PTMVTP	VTPLATIATPEATPVGFAATSATAVALDKVTHNVG	35	1	7	0	0	0	7	0	7	0.2	8	2	5	2	1	18	0.514286
B	MSILADFANAELTDVKPGRIGADSTPTMVTPLATIATPEATPVGFAATSATAVALDKVTHNIG	PTMVTP	VTPLATIATPEATPVGFAATSATAVALDKVTHNIG	35	1	7	0	0	0	7	0	7	0.2	8	2	4	2	2	18	0.514286
B	MSVVAEFANTQLVDVQPGQVGAHAAPTMITPLATIATPEAVPIGVAVTSATAIAVNAVTQKVAG	PTMITP	ITPLATIATPEAVPIGVAVTSATAIAVNAVTQKVAG	36	1	6	0	0	0	6	0	6	0.166667	9	2	6	1	4	22	0.611111
B	MAEFANTQLVDVKPGRIGSDAAPTMMTPLATVATPEAVSAGIAVTSATAAALNMVTHNVQHG	PTMMTP	MTPLATVATPEAVSAGIAVTSATAAALNMVTHNVQHG	37	2	6	0	0	0	7	0	7	0.189189	9	2	5	2	1	19	0.513514
B	MSVVAEFANTQLVDVKPGRIGSDAAPTMMTPLATVATPEAVSAGIAVTSATAAALNMVTHNVQHG	PTMMTP	MTPLATVATPEAVSAGIAVTSATAAALNMVTHNVQHG	37	2	6	0	0	0	7	0	7	0.189189	9	2	5	2	1	19	0.513514
B	MAGEFAQTTERGQQMSVLAEFANTELVDVEPGRLGSEATPTMITPLATLATPEATPVGFAATSATAAAVNMITHDVTRH	PTMITP	ITPLATLATPEATPVGFAATSATAAAVNMITHDVTRH	37	1	8	0	0	0	8	0	8	0.216216	9	1	3	2	2	17	0.459459
B	MSVVAEFANTNLVDVQPGRIGSDAAPTMMTPLATVATPEAVSAGIAVTCATAIALNQVTHNVQHG	PTMMTP	MTPLATVATPEAVSAGIAVTCATAIALNQVTHNVQHG	37	1	6	1	0	1	6	0	7	0.189189	8	2	5	2	2	19	0.513514
B	MSVVAEFANTNLVDVKPGRIGSDAAPTMMTPLATVATPEAVSAGIAVTCATAIALNQVTHNVQHG	PTMMTP	MTPLATVATPEAVSAGIAVTCATAIALNQVTHNVQHG	37	1	6	1	0	1	6	0	7	0.189189	8	2	5	2	2	19	0.513514
B	MSTRKRTEMSVVAEFANTQLVDVKPGRIGSDAAPTMMTPLATVATPEAVSAGIAVTSATAAALNMVTHNVQHG	PTMMTP	MTPLATVATPEAVSAGIAVTSATAAALNMVTHNVQHG	37	2	6	0	0	0	7	0	7	0.189189	9	2	5	2	1	19	0.513514
B	MSLVSEFANETLTDVAPGMLSATDVATRLDTPADPVMATPLIVETVLLTTGWIANNIANYVDRVNY	PVMATP	MITPLATLATPEATPVGFAATSATAAAVNMITHDVTRH	38	1	8	0	0	0	8	0	8	0.210526	9	1	3	2	2	17	0.447368
B	MSLVAQFANEALTDISPGMLSETDAASRLDGPADPVMVTPFAALTVTCPEVAALAGAAFGALAANVANYVGRNAH	PVMVTP	VTPFAALTVTCPEVAALAGAAFGALAANVANYVGRNAH	38	0	3	1	0	1	3	0	4	0.105263	12	3	5	3	0	23	0.605263
C1	MNDITAFINEDARLDEVPIERAEGTVLVEQGVTVLATPSANFCLTFAIGK	TVLATP	ATPSANFCLTFAIGK	15	1	2	1	0	1	2	0	3	0.2	3	1	0	1	1	6	0.4
C1	MREIIVKAEPKLSESDKGQVVVPQGPVLATPVAAATVAFATGVAVTKAVG	PVLATP	ATPVAAATVAFATGVAVTKAVG	22	0	4	0	0	0	4	0	4	0.181818	8	2	5	0	0	15	0.681818
C1	MFQLMEEVMLLEKVNADNTLVGELKAAALPGPATPVMSTPTLVRVIANVAQATKATRAAG	PVMSTP	STPTLVRVIANVAQATKATRAAG	23	1	4	0	0	0	4	0	4	0.173913	6	1	3	1	1	12	0.521739
C1	MNDVTSHINASAELASVEITDAEGVVFTDYTPVMGTPGAFLGGVAIASATVAAFEQGQG	PVMGTP	GTPGAFLGGVAIASATVAAFEQGQG	25	1	2	0	0	0	2	0	2	0.08	6	6	2	1	1	16	0.64
C1	MQDIAEYMNNHPDLQGDITDADGAVRTEMLPVLATPVIVARTALATVAAYTVTRNHIG	PVLATP	ATPVIVARTALATVAAYTVTRNHIG	25	0	5	0	0	0	5	0	5	0.2	6	1	4	1	2	14	0.56
C1	MNDVTSHINASAELASVEITDAEGVVFTDYTPVMGTPGAFLGGVAIASATVAAFEQGQG	PVMGTP	GTPGAFLGGVAIASATVAAFEQGQG	25	1	2	0	0	0	2	0	2	0.08	6	6	2	1	1	16	0.64
C1	MIDVTSHINESAELSSVEVTDAEGVVFTDYTPVLATPGAFLGGVAIASATVAAFEQGQG	PVLATP	ATPGAFLGGVAIASATVAAFEQGQG	25	1	2	0	0	0	2	0	2	0.08	7	5	2	1	1	16	0.64
C1	MIDVTSHINESAELSSVEVTDAEGVVFTDYTPVLATPGAFLGGVAIASATVAAFEQGQG	PVLATP	ATPGAFLGGVAIASATVAAFEQGQG	25	1	2	0	0	0	2	0	2	0.08	7	5	2	1	1	16	0.64
C1	MKDVTSQINESAELASVDIADTEGVVFTDYTPVMGTPGAFLGGVAIASATVAAFEAGQG	PVMGTP	GTPGAFLGGVAIASATVAAFEAGQG	25	1	2	0	0	0	2	0	2	0.08	7	6	2	1	1	17	0.68
C1	MNDITSHINESAELAAVDAEGAIFADNTPVLATPGAFLGGVAIASATVAAFEAGQG	PVLATP	ATPGAFLGGVAIASATVAAFEAGQG	25	1	2	0	0	0	2	0	2	0.08	8	5	2	1	1	17	0.68
C1	MESTMDQLVARLNTSPDLASVEVSSTEGAVFPGASPVLGTPGAFLGGVAIASATVAAFEAGRG	PVLGTP	GTPGAFLGGVAIASATVAAFEAGRG	25	1	2	0	0	0	2	0	2	0.08	7	6	2	1	1	17	0.68
C1	MIDVAAAANEMEIPEEGAIFPMATPVLATPAAFMGGIAISSAVVGAFEAGRNG	PVLATP	ATPAAFMGGIAISSAVVGAFEAGRNG	26	2	1	0	0	0	2	0	2	0.0769231	7	5	2	0	2	16	0.615385
C1	MIDVAAAANEMEIPEEGAIFAVATPVLATPAAFMGGIAISSAVVGAFEAGRNG	PVLATP	ATPAAFMGGIAISSAVVGAFEAGRNG	26	2	1	0	0	0	2	0	2	0.0769231	7	5	2	0	2	16	0.615385
C1	MQQTRQLDAVPFDSDEATTFCGLRPVAATPAAVAWAGAVVAAAGVGAAIGDAVD	PVAATP	ATPAAVAWAGAVVAAAGVGAAIGDAVD	27	0	1	0	0	0	1	0	1	0.037037	12	4	5	0	1	22	0.814815
C1	MLEEKLNLQIQDQLHEGHEGEIAEEAAPVLATPALAGAFVGGAAVVTGAYAAGKAVG	PVLATP	ATPALAGAFVGGAAVVTGAYAAGKAVG	27	0	2	0	0	0	2	0	2	0.0740741	10	6	4	1	0	21	0.777778
C1	MLEAKLNLQIQDELHEGHDGEIAEEATPVLATPALAGAFVGGAAVVTGAYAAGKAVG	PVLATP	ATPALAGAFVGGAAVVTGAYAAGKAVG	27	0	2	0	0	0	2	0	2	0.0740741	10	6	4	1	0	21	0.777778
C1	MLEEKLNIQAEEFGKLDENHAGRIAEAATPVLATPALAGAFVAGAGVVTGAYAAGKAVG	PVLATP	ATPALAGAFVAGAGVVTGAYAAGKAVG	27	0	2	0	0	0	2	0	2	0.0740741	10	6	4	1	0	21	0.777778
C1	MLEEKLNLQIQDELHEEHAGEIADKAAPVLATPALAGAFVGGAAVVTGAYAAGKAVG	PVLATP	ATPALAGAFVGGAAVVTGAYAAGKAVG	27	0	2	0	0	0	2	0	2	0.0740741	10	6	4	1	0	21	0.777778
C1	MNEVTALLDEMDIPEEGVVFPVAAPVLATPAAFMGGIAISCAVVSAFEAGRGNG	PVLATP	ATPAAFMGGIAISCAVVSAFEAGRGNG	27	2	1	1	0	1	2	0	3	0.111111	7	5	2	0	2	16	0.592593
C1	MSTLADYTNAVSPETFGDLTETTAGRGLTAGTPVLATPAVVVTMVAAFAAGYAMGRSGTVPK	PVLATP	ATPAVVVTMVAAFAAGYAMGRSGTVPK	27	1	3	0	0	0	3	0	3	0.111111	7	3	5	0	0	15	0.555556
C1	MSVLTERVNASSVLAELPLRSDRAQQMDELAPVLATPAIACMGFASVSGPSLAVAGSKQPS	PVLATP	ATPAIACMGFASVSGPSLAVAGSKQPS	27	5	1	1	0	1	5	0	6	0.222222	6	3	2	1	1	13	0.481481
C1	MQRKDTSMTTIADIAFDSDRGQRFAPEQPLAATPLAALAATSVFTGAVAAYAVEETVGN	PLAATP	ATPLAALAATSVFTGAVAAYAVEETVGN	28	1	4	0	0	0	4	0	4	0.142857	9	2	4	2	0	17	0.607143
C1	MQRKDTSMTTIADIAFDSDRGQRFAPEQPLAATPLAALAATSVFTGAVAAYAVEETVGN	PLAATP	ATPLAALAATSVFTGAVAAYAVEETVGN	28	1	4	0	0	0	4	0	4	0.142857	9	2	4	2	0	17	0.607143
C1	MSTLVDYTNAVSPGMFGDLTETTGGRGLTAETPVLATPAVVVTMVAAFAAGYAMGRGAGTLPN	PVLATP	ATPAVVVTMVAAFAAGYAMGRGAGTLPN	28	0	3	0	0	0	3	0	3	0.107143	8	4	4	1	0	17	0.607143
C1	MEELLDRTNEQSDDLFGVLTPQTQVEFDTGNTPVLATPAAAAAGAGATVGAFAAGVAVGYAVG	PVLATP	ATPAAAAAGAGATVGAFAAGVAVGYAVG	28	0	2	0	0	0	2	0	2	0.0714286	13	6	4	0	0	23	0.821429
C1	MDKLVSYTNAVSEDMFGELELAVDVRDMSAATPCMATPAAVAAGATLGAAAFGAGFGIGYAYG	PCMATP	ATPAAVAAGATLGAAAFGAGFGIGYAYG	28	0	2	0	0	0	2	0	2	0.0714286	11	7	1	1	1	21	0.75
C1	MTSAHRAGNRAQRPTITIAERKESSMTTIADIAFDSDRGQRFAPEQPLAATPLAALAATSVFTGAVAAYAVEEAVGN	PALATP	ATPLAALAATSVFTGAVAAYAVEEAVGN	28	1	3	0	0	0	3	0	3	0.107143	10	2	4	2	0	18	0.642857
C1	MLLQAIEDQTSRAGVSLERMTITRKPDAAVLATPTLAMAFGALQGGWFVGEMVKNVIRGG	AVLATP	ATPTLAMAFGALQGGWFVGEMVKNVIRGG	29	0	2	0	0	0	2	0	2	0.0689655	4	6	3	2	1	16	0.551724
C1	MTLLAEKVNADPAFDAISIHSTYPVHTSVEVPVLCVTATMGAASGLSTANVGAVNGGTVLTIA	PVLCVT	CVTATMGAASGLSTANVGAVNGGTVLTIA	29	2	5	1	0	1	6	0	7	0.241379	6	5	4	2	1	18	0.62069
C1	MLTEHVNASSVLAEFPLRADRARRMDELTPVLATPGAVVVAVGLYVVATPYVAGAIGSKQPS	PVLATP	ATPGAVVVAVGLYVVATPYVAGAIGSKQPS	30	2	2	0	0	0	3	0	3	0.1	6	4	7	1	1	19	0.633333
C1	MEHIIEKVERETEPQLSEHSSMRNPGLDPVMATPAAFVGAAGYGWITLQAYDMGREHAGANG	PVLATP	ATPAAFVGAAGYGWITLQAYDMGREHAGANG	31	0	2	0	0	0	2	0	2	0.0645161	8	6	1	1	1	17	0.548387
C1	MNPLTPPASLVGSGALTETDGGSVRLGSAPVTATPLAVTAGLAAGVALGYALANSTHPTLPHA	PVTATP	ATPLAVTAGLAAGVALGYALANSTHPTLPHA	31	1	4	0	0	0	4	0	4	0.129032	9	3	2	5	0	19	0.612903
C1	MSKSSAPAVLTATGALTESDPGVTLPALAPVAATPVAIAATLGAAFIAGYAAGRAAGNVELPM	PVAATP	ATPVAIAATLGAAFIAGYAAGRAAGNVELPM	31	0	2	0	0	0	2	0	2	0.0645161	11	4	2	2	2	21	0.677419
C1	MNTSSTPAVLTATGALTESDPGATLPAIAPVAATPVVVVAALGAGFVAGYAAGRAAGNVELPM	PVAATP	ATPVVVVAALGAGFVAGYAAGRAAGNVELPM	31	0	1	0	0	0	1	0	1	0.0322581	9	5	6	2	0	22	0.709677
C1	MSAMPVSQLPADLAAMSELKEGAAGRVPATAQPVMATPTIALAFAAGVGIGFAACQVVGDIRPVEN	PVMATP	ATPTIALAFAAGVGIGFAACQVVGDIRPVEN	31	0	2	1	0	1	2	0	3	0.0967742	7	4	4	1	3	19	0.612903
C1	MNTSSTPAVLTATGALTESDPGAALPSLAPVTATPVVIVAALGAGFVAGYAAGRAAGNVELPM	PVTATP	ATPVVIVAALGAGFVAGYAAGRAAGNVELPM	31	0	1	0	0	0	1	0	1	0.0322581	9	5	5	2	1	22	0.709677
C1	MSTLLQKVNTSQELHAVASDLADAKDLSLTLPVLATITTVCPATGYIVGGGLFATGIGITYTVNR	PVLATI	ATITTVCPATGYIVGGGLFATGIGITYTVNR	31	0	7	1	0	1	7	0	8	0.258065	3	6	3	1	4	17	0.548387
C1	MNTSSTPAVLTATGALTESDPGATLPAIAPVAATPVVVVAALGAGFVAGYAAGRAAGNVELPM	PVAATP	ATPVVVVAALGAGFVAGYAAGRAAGNVELPM	31	0	1	0	0	0	1	0	1	0.0322581	9	5	6	2	0	22	0.709677
C1	MNTSSTPAVLTATGALTESDPGATLPAIAPVTATPVVIVAALGAGFVAGYAAGRAAGNVELPM	PVTATP	ATPVVIVAALGAGFVAGYAAGRAAGNVELPM	31	0	1	0	0	0	1	0	1	0.0322581	9	5	5	2	1	22	0.709677
C1	MSVSQLPADLAAVSELKVGAAGQVKAAAQPVMATPTLAVAFVAGIGVGLAACQANGTTRPVAE	PVMATP	ATPTLAVAFVAGIGVGLAACQANGTTRPVAE	31	0	4	1	0	1	4	0	5	0.16129	8	4	4	2	1	19	0.612903
C1	MSVLTERVNASRVLAELPLRADRAQQMDELAPVLATPSAALVAAAAAVAVALADIYTVAGSKQPN	PVLATP	ATPSAALVAAAAAVAVALADIYTVAGSKQPN	31	2	2	0	0	0	3	0	3	0.0967742	12	1	4	2	1	20	0.645161
C1	MSNLADKVNADRELARTPLLATEPQHVGALTPVLATPAAFGAGLAGAAAVAGTFGAGYVAGNAIGG	PVLATP	ATPAAFGAGLAGAAAVAGTFGAGYVAGNAIGG	32	0	2	0	0	0	2	0	2	0.0625	12	9	2	1	1	25	0.78125
C1	MRNLARNVNENPSFDLGDLTPTTEGRKLDPHAPVLATPAAAAAATVGAAATVGAGVAGFVAEEAADG	PVLATP	ATPAAAAAATVGAAATVGAGVAGFVAEEAADG	32	0	3	0	0	0	3	0	3	0.09375	15	5	4	0	0	24	0.75
C1	MSRIVDSVVAVTPQHLSDEAHGEFGAMMPVQATPALIAFGVGFAGGAGAAWVTVQAYEAGAND	PVQATP	ATPALIAFGVGFAGGAGAAWVTVQAYEAGAND	32	0	2	0	0	0	2	0	2	0.0625	10	6	3	1	1	21	0.65625
C1	MSKIVRSVAAVTPEVLTEDVHGDSGSMMPIQATPALVAFGAGFAGGAGISWVCVQAYEAGAND	PIQATP	ATPALVAFGAGFAGGAGISWVCVQAYEAGAND	32	1	1	1	0	1	1	0	2	0.0625	9	6	3	1	1	20	0.625
C1	MTSISDHVNGRSPMLFGDLRTTHGARHLSELTPVMATPAAFAAGVGVSVAAYAVGYAVGALGSKQPS	PVMATP	ATPAAFAAGVGVSVAAYAVGYAVGALGSKQPS	32	3	1	0	0	0	3	0	3	0.09375	10	5	5	1	0	21	0.65625
C1	MNASVFQTVPAAARPLTEEDPGYTATGTAPVAATPVLATAVFAAGFVAGVVVCDAIGDTSPVEQ	PVLATP	ATPVLATAVFAAGFVAGVVVCDAIGDTSPVEQ	32	1	3	1	0	1	3	0	4	0.125	7	3	7	1	1	19	0.59375
C1	MNDQSRRLYDSSALATVAVDDPRGWISARQKPVLSTPAVVAGLAIGYAMLNAFEAGRNGGPIRPAL	PVLSTP	STPAVVAGLAIGYAMLNAFEAGRNGGPIRPAL	32	1	1	0	0	0	1	0	1	0.03125	7	5	2	3	2	19	0.59375
C1	MSRITESVIAVTPEKLDDGATTELGAMAPVQATPGFVAFGVGFAGGAGVAWLGVQAYEAGVND	PVQATP	ATPGFVAFGVGFAGGAGVAWLGVQAYEAGVND	32	0	1	0	0	0	1	0	1	0.03125	7	8	5	1	0	21	0.65625
C1	MSRIVDSVVAVTPTDLTDDSQGEFGAMAPVQATPTLVAFGVGFAGGAGAAWVTVQAYEAGAND	PVQATP	ATPTLVAFGVGFAGGAGAAWVTVQAYEAGAND	32	0	3	0	0	0	3	0	3	0.09375	9	6	4	1	0	20	0.625
C1	MSVVLDKVNASVEFGAIPGHISEAEWGNATDVPVLATPVTLTPTIGKVTLGVGAFTGGIAVGDALFG	PVLATP	ATPVTLTPTIGKVTLGVGAFTGGIAVGDALFG	32	0	6	0	0	0	6	0	6	0.1875	4	7	4	3	2	20	0.625
C1	MSVAQLPADLAAMPGLREDDAGRPPASAMPVTHVLTSGQAACVTVAVAIAVGDTRPVLK	PASAMP	AMPVTHVLTSGQAACVTVAVAIAVGDTRPVLK	32	1	4	1	0	1	4	0	5	0.15625	6	2	7	2	1	18	0.5625
C1	MSRIVDSVVAVTSQHLSDEAHGEFGVMMPVQATPTLIAFGVGFAGGAGAAWVTVQAYEAGAND	PVQATP	ATPTLIAFGVGFAGGAGAAWVTVQAYEAGAND	32	0	3	0	0	0	3	0	3	0.09375	9	6	3	1	1	20	0.625
C1	MVVDTLLEKVNGSSDLVRVSIREEQATTMVGLGPVLATPGAFAAGAGAACAVAGAFGAGYAIGQDLAG	PVLATP	ATPGAFAAGAGAACAVAGAFGAGYAIGQDLAG	32	0	1	1	0	1	1	0	2	0.0625	13	8	1	1	1	24	0.75
C1	MSRIVDSVVAVTPTDLTDDSQGEFGAMAPVQATPTLVAFGVGFAGGAGAAWVTVQAYEAGAND	PVQATP	ATPTLVAFGVGFAGGAGAAWVTVQAYEAGAND	32	0	3	0	0	0	3	0	3	0.09375	9	6	4	1	0	20	0.625
C1	MSKSSTPAVLTATGDLTESDPGVTLPALAPVTATPVAIAATLGAAFLAGYAAGRAAGSDVELPM	PVLATP	ATPVAIAATLGAAFLAGYAAGRAAGSDVELPM	32	1	2	0	0	0	2	0	2	0.0625	11	4	2	3	1	21	0.65625
C1	MNKSSAPAVLTATGALTESDAGVTLPTLAPVAATPVAIAATMGVAFVAGYAAGRAATGNVELPM	PVVATP	ATPVAIAATMGVAFVAGYAAGRAATGNVELPM	32	0	3	0	0	0	3	0	3	0.09375	10	4	4	1	1	20	0.625
C1	MSRIIESVAAITPEHLTDGSHGDVVAMAPVQATPGLVAFGIGFAGGAGVSWVGVQAYEAGAND	PVQATP	ATPGLVAFGIGFAGGAGVSWVGVQAYEAGAND	32	1	1	0	0	0	1	0	1	0.03125	7	8	4	1	1	21	0.65625
C1	MSRIVDSVVAVTPTDLTDDSQGEFGAMAPVQATPTLVAFGVGFAGGAGAAWVTVQAYEAGAND	PVQATP	ATPTLVAFGVGFAGGAGAAWVTVQAYEAGAND	32	0	3	0	0	0	3	0	3	0.09375	9	6	4	1	0	20	0.625
C1	MSRIVDSVVAVTSADLTDDSQGEFGAMAPVQATPTLVAFGVGFAGGAGAAWVTVQAYEAGAND	PVQATP	ATPTLVAFGVGFAGGAGAAWVTVQAYEAGAND	32	0	3	0	0	0	3	0	3	0.09375	9	6	4	1	0	20	0.625
C1	MSRIVDSVVAVTSADLTDDSQGEFGAMAPVQATPTLVAFGVGFAGGAGAAWVTVQAYEAGAND	PVQATP	ATPTLVAFGVGFAGGAGAAWVTVQAYEAGAND	32	0	3	0	0	0	3	0	3	0.09375	9	6	4	1	0	20	0.625
C1	MNKSSAPAVLTATGALTESDAGVTLPTLAPVAATPVAIAATMGVAFVAGYAAGRAATGNVELPM	PVAATP	ATPVAIAATMGVAFVAGYAAGRAATGNVELPM	32	0	3	0	0	0	3	0	3	0.09375	10	4	4	1	1	20	0.625
C1	MNAAVFQAVPAAARPLTEKDPGHTATGTAPVAATPVIVVTAFAAGVAAGVALCDAIGDTSPVEQ	PVAATP	ATPVIVVTAFAAGVAAGVALCDAIGDTSPVEQ	32	1	3	1	0	1	3	0	4	0.125	8	3	6	1	2	20	0.625
C1	MSKSSAPAALTATGALTESDPGVTLPGLAPVAATPVAIVASLGAAFVAGYAAGRAAGSDIELPM	PVAATP	ATPVAIVASLGAAFVAGYAAGRAAGSDIELPM	32	2	1	0	0	0	2	0	2	0.0625	10	4	3	2	2	21	0.65625
C1	MNKSSAPAVLTATGALTESAPGVTLPTLAPVAATPVAIAATMGVAFVAGYAAGRAATGNVELPM	PVAATP	ATPVAIAATMGVAFVAGYAAGRAATGNVELPM	32	0	3	0	0	0	3	0	3	0.09375	10	4	4	1	1	20	0.625
C1	MNKSSAPAVLTATGALTESAPGVTLPTLAPVAATPVAIAATMGVAFVAGYAAGRAATGNVELPM	PVAATP	ATPVAIAATMGVAFVAGYAAGRAATGNVELPM	32	0	3	0	0	0	3	0	3	0.09375	10	4	4	1	1	20	0.625
C1	MSRIVDSVVAVTPAHLTDDSQGEFGAMAPVQATPTLVAFGVGFAGGAGAAWVTVQAYEAGAND	PVQATP	ATPTLVAFGVGFAGGAGAAWVTVQAYEAGAND	32	0	3	0	0	0	3	0	3	0.09375	9	6	4	1	0	20	0.625
C1	MSRIVDSVVAVTPAHLTDDSQGEFGAMAPVQATPTLVAFGVGFAGGAGAAWVTVQAYEAGAND	PVQATP	ATPTLVAFGVGFAGGAGAAWVTVQAYEAGAND	32	0	3	0	0	0	3	0	3	0.09375	9	6	4	1	0	20	0.625
C1	MNKSSAPAVLTATGALTESDAGVTLPTLAPVAATPVAIAATMGVAFVAGYAAGRAATGNVELPM	PVAATP	ATPVAIAATMGVAFVAGYAAGRAATGNVELPM	32	0	3	0	0	0	3	0	3	0.09375	10	4	4	1	1	20	0.625
C1	MNDQSRRLYDSPALASVAVDDARGWISARQKPVLATPSVLAGIAIGYAMLNAFEAGRSGGPIRPTS	PVLATP	ATPSVLAGIAIGYAMLNAFEAGRSGGPIRPTS	32	3	2	0	0	0	4	0	4	0.125	6	5	1	2	3	17	0.53125
C1	MATLEARVGDAVTVFSSRPAIGEAVRVRSDADGPVLATPLALAGAFAGGAAIGGGLVAAFEAGRAVAGG	PVLATP	ATPLALAGAFAGGAAIGGGLVAAFEAGRAVAGG	33	0	1	0	0	0	1	0	1	0.030303	12	9	2	3	1	27	0.818182
C1	MSKIVESVVAVTPEELTDETHGEFGAMMPIQATPGLVAFGVGFAGGAGAAWVTVQAYEAGRTAG	PIQATP	ATPGLVAFGVGFAGGAGAAWVTVQAYEAGRTAG	33	0	3	0	0	0	3	0	3	0.0909091	9	8	4	1	0	22	0.666667
C1	MEQKVAAFMNEQDFGPLEQGYQDDTPAPVLATPGAVATCWYVGGAVVGAGSVVGAYVTGRVVG	PVLATP	ATPGAVATCWYVGGAVVGAGSVVGAYVTGRVVG	33	1	3	1	0	1	3	0	4	0.121212	6	8	9	0	0	23	0.69697
C1	MSTSPIPAALRGAGGLSESAPGQALSTFAPVAATPGIVAGAAIGVALVNAFVAGYNYTGNVELPM	PVAATP	ATPGIVAGAAIGVALVNAFVAGYNYTGNVELPM	33	0	2	0	0	0	2	0	2	0.0606061	7	5	5	2	2	21	0.636364
C1	MNRITESARKAASPTLSEVQSDKVVRMMPVAFTPSVVALCPYAAGGLAAGAAVVGAYEAGRAAG	PVAFTP	FTPSVVALCPYAAGGLAAGAAVVGAYEAGRAAG	33	1	1	1	0	1	1	0	2	0.0606061	11	6	4	2	0	23	0.69697
C1	MEQKVAAFMNEQDFGPLEQGYQDDTPAPVLATPGAVATCWYVGGAVVGAGSVVGAYVTGRVVG	PVLATP	ATPGAVATCWYVGGAVVGAGSVVGAYVTGRVVG	33	1	3	1	0	1	3	0	4	0.121212	6	8	9	0	0	23	0.69697
C1	MEHKIAGFMNTQDFGTLEQGYQDDAAAPVLATPAAVATCWYVGGAVVGAGAVVGAYVTGRVNG	PVLATP	ATPAAVATCWYVGGAVVGAGAVVGAYVTGRVNG	33	0	3	1	0	1	3	0	4	0.121212	8	7	8	0	0	23	0.69697
C1	MSKIVESVVAVTPEELTDETHGEFGAMMPIQATPGLVAFGVGFAGGAGAAWVTVQAYEAGRTAG	PIQATP	ATPGLVAFGVGFAGGAGAAWVTVQAYEAGRTAG	33	0	3	0	0	0	3	0	3	0.0909091	9	8	4	1	0	22	0.666667
C1	MEHKIAGFMNTQDLGTLEQGYQDDDAAPVLATPAAVATCWYVGGAVAGAGAVVGAYVTGRVNG	PVLATP	ATPAAVATCWYVGGAVAGAGAVVGAYVTGRVNG	33	0	3	1	0	1	3	0	4	0.121212	9	7	7	0	0	23	0.69697
C1	MNDVSFLSRPGSMADIDIRDPHGRSVSGQAPVTATPGVAAGVAIGYALIYAFNAGLNSTHPTLPHA	PVTATP	ATPGVAAGVAIGYALIYAFNAGLNSTHPTLPHA	33	1	3	0	0	0	3	0	3	0.0909091	8	4	2	3	2	19	0.575758
C1	MASIADFMNAQLLGPIEQGMTKGNGVPVMATPAVAVPASVKITAAVVAFTVPVAAYVAGRAVN	PVMATP	ATPAVAVPASVKITAAVVAFTVPVAAYVAGRAVN	34	1	3	0	0	0	3	0	3	0.0882353	11	1	9	0	1	22	0.647059
C1	MLEKVNASAELDALAVQVDEGEWARPTAPVLATPAVIGTAVGAAGAVVGALVGGFIVADNVLGGS	PVLATP	ATPAVIGTAVGAAGAVVGALVGGFIVADNVLGGS	34	1	2	0	0	0	2	0	2	0.0588235	8	8	7	2	2	27	0.794118
C1	MEQKIAAFMNEQDLGSLEQGYRDDAPMPVLATPAAAVATCWYVGGAAAGAAAVVGAYVTGRVVG	PVLATP	ATPAAAVATCWYVGGAAAGAAAVVGAYVTGRVVG	34	0	3	1	0	1	3	0	4	0.117647	12	6	7	0	0	25	0.735294
C1	MNTSPIPAALRGVGGLSESASGRALSTFAPVAATPGIAAGAALGVALVNAFVAGYNHCGGNVELPM	PVAATP	ATPGIAAGAALGVALVNAFVAGYNHCGGNVELPM	34	0	1	1	0	1	1	0	2	0.0588235	8	6	4	3	1	22	0.647059
C1	MATIAEFMNDQKLGVLELGYKEDSQEPVLATPAAAVATCWYVGGAAAGVTVVAGAYVAGRVFG	PVLATP	ATPAAAVATCWYVGGAAAGVTVVAGAYVAGRVFG	34	0	3	1	0	1	3	0	4	0.117647	11	6	7	0	0	24	0.705882
C1	MEQKIAAFMNEQDLGSLEQGYRDDAPMPVLATPAAAVATCWYVGGAAAGAAAVVGAYVTGRVVG	PVLATP	ATPAAAVATCWYVGGAAAGAAAVVGAYVTGRVVG	34	0	3	1	0	1	3	0	4	0.117647	12	6	7	0	0	25	0.735294
C1	MEQKIAAFMNEQDLGSLEQGYRDDAPMPVLATPAAAVATCWYVGGAAAGAAAVVGAYVTGRVVG	PVLATP	ATPAAAVATCWYVGGAAAGAAAVVGAYVTGRVVG	34	0	3	1	0	1	3	0	4	0.117647	12	6	7	0	0	25	0.735294
C1	MSTSSTPAALRGAGGLSESDPGRALSTLAPVAATPGIVAGAALGVALVNAFVAGYNHGGGNVELPM	PVAATP	ATPGIVAGAALGVALVNAFVAGYNHGGGNVELPM	34	0	1	0	0	0	1	0	1	0.0294118	7	7	5	3	1	23	0.676471
C1	MEQKIAAFMNEQDLGSLEQGYRDDAPMPVLATPAAAVATCWYVGGAAAGAAAVVGAYVTGRVVG	PVLATP	ATPAAAVATCWYVGGAAAGAAAVVGAYVTGRVVG	34	0	3	1	0	1	3	0	4	0.117647	12	6	7	0	0	25	0.735294
C1	MAKIADFMNTQQLGPIEQGLTNTDGVPVMATPAVAVPVTVKITAGIVAFTIPVGAYVAGRVVN	PVLATP	ATPAVAVPVTVKITAGIVAFTIPVGAYVAGRVVN	34	0	4	0	0	0	4	0	4	0.117647	7	3	9	0	3	22	0.647059
C1	MAKIADFMNTQQLGPIEQGLTNTDGVPVMATPAVAVPVTVKITAGIVAFTIPVGAYVAGRVVN	PVLATP	ATPAVAVPVTVKITAGIVAFTIPVGAYVAGRVVN	34	0	4	0	0	0	4	0	4	0.117647	7	3	9	0	3	22	0.647059
C1	MNMSPTPAALRGAGGLSESDPGRAHSTLVPVAATPGVLAGVAVGVALVNAFAAGYNHCGGNVELPM	PVLATP	ATPGVLAGVAVGVALVNAFAAGYNHCGGNVELPM	34	0	1	1	0	1	1	0	2	0.0588235	7	6	6	3	0	22	0.647059
C1	MSMSPTPAALRGTGGLSESDPGRALSSLAPVAATPGVVAGVAVGVALVNAFAAGYNHCGGNVELPM	PVAATP	ATPGVVAGVAVGVALVNAFAAGYNHCGGNVELPM	34	0	1	1	0	1	1	0	2	0.0588235	7	6	7	2	0	22	0.647059
C1	MEQKIAAFMNEQDLGSLEQGYRDDAPMPVLATPAAAVATCWYVGGAAAGAAAVVGAYVTGRVVG	PVLATP	ATPAAAVATCWYVGGAAAGAAAVVGAYVTGRVVG	34	0	3	1	0	1	3	0	4	0.117647	12	6	7	0	0	25	0.735294
C1	MEQKIAAFMNEQDLGSLEQGYRDDAPMPVLATPAAAVATCWYVGGAAAGAAAVVGAYVTGRVVG	PVLATP	ATPAAAVATCWYVGGAAAGAAAVVGAYVTGRVVG	34	0	3	1	0	1	3	0	4	0.117647	12	6	7	0	0	25	0.735294
C1	MTNVITRLHATGQLPVTAIADTESGGLTAAAYPVLGTPAFAVPFTAKAFSAGIAFGAATVAAYDAGAGK	PVLGTP	GTPAFAVPFTAKAFSAGIAFGAATVAAYDAGAGK	34	1	3	0	0	0	3	0	3	0.0882353	12	5	2	0	1	20	0.588235
C1	MLLEKVNNSEELSTLPLMLDEDKGAAPTEPVLATPAAVAAGIAGVTLVATAVAGGIGLAVTVNGNS	PVLATP	ATPAAVAAGIAGVTLVATAVAGGIGLAVTVNGNS	34	1	4	0	0	0	4	0	4	0.117647	10	6	6	2	2	26	0.764706
C1	MEMKIAAFMNEQDLGSLERGYQDDAPAPVLATPLAAVATCWYVGGAVAGAAVVAGAYVTGRVVG	PVLATP	ATPLAAVATCWYVGGAVAGAAVVAGAYVTGRVVG	34	0	3	1	0	1	3	0	4	0.117647	10	6	8	1	0	25	0.735294
C1	MSMSPTPAALRGAGGLSESDPGRALSSLAPVTATPGVVAGVALGVALVNAFAAGYNHCGGNVELPM	PVTATP	ATPGVVAGVALGVALVNAFAAGYNHCGGNVELPM	34	0	1	1	0	1	1	0	2	0.0588235	7	6	6	3	0	22	0.647059
C1	MNNIIEAVNEMDIPAEGKVFPDATPVLATPGAFLGGVAVSSAVIGAFELGRGGGSAPATQL	PVLATP	ATPGAFLGGVAVSSAVIGAFELGRGGGSAPATQL	34	3	2	0	0	0	4	0	4	0.117647	7	8	3	3	1	22	0.647059
C1	MEQKIATFMNGQEFGSLENGFHETAPAPVMGTPVAAVATCWYVAGGVAGAGAVVGAYTWGVANG	PVMGTP	GTPVAAVATCWYVAGGVAGAGAVVGAYTWGVANG	34	0	3	1	0	1	3	0	4	0.117647	9	8	7	0	0	24	0.705882
C1	MNQQELGSLEDGLTKTDGTPVMATPAVAVPVTVKITAGIVAFTIPVGAYVAGRVVN	PVMATP	ATPAVAVPVTVKITAGIVAFTIPVGAYVAGRVVN	34	0	4	0	0	0	4	0	4	0.117647	7	3	9	0	3	22	0.647059
C1	MEQKIAAFMNEQDLGSLEQGYRDDAPMPVLATPAAAVATCWYVGGAAAGAAAVVGAYVTGRVVG	PVLATP	ATPAAAVATCWYVGGAAAGAAAVVGAYVTGRVVG	34	0	3	1	0	1	3	0	4	0.117647	12	6	7	0	0	25	0.735294
C1	MSMSPTPAALRGAGGLSESDPGRALSSLAPVTATPGVVAGVALGVALVNAFAAGYNHCGGNVELPM	PVTATP	ATPGVVAGVALGVALVNAFAAGYNHCGGNVELPM	34	0	1	1	0	1	1	0	2	0.0588235	7	6	6	3	0	22	0.647059
C1	MSMSPTPAALRGAGGLSESDPGRALSSLAPVTATPGVVAGVALGVALVNAFAAGYNHCGGNVELPM	PVTATP	ATPGVVAGVALGVALVNAFAAGYNHCGGNVELPM	34	0	1	1	0	1	1	0	2	0.0588235	7	6	6	3	0	22	0.647059
C1	MNMSPTPAALRGAGGLSESDPGRALSTLAPVAATPGVVAGVALGVALVNAFVAGYNHCGGNVELPM	PVAATP	ATPGVVAGVALGVALVNAFVAGYNHCGGNVELPM	34	0	1	1	0	1	1	0	2	0.0588235	6	6	7	3	0	22	0.647059
C1	MSMSPTPAALRGTGGLSESDPGRALSSLAPVAATPGVVAGVAVGVALVNAFAAGYNHCGGNVELPM	PVAATP	ATPGVVAGVAVGVALVNAFAAGYNHCGGNVELPM	34	0	1	1	0	1	1	0	2	0.0588235	7	6	7	2	0	22	0.647059
C1	MNMSPTPAALRGAGGLSESDPGRAHSTLVPVAATPGVLAGVAVGVALVNAFAAGYNHCGGNVELPM	PVAATP	ATPGVLAGVAVGVALVNAFAAGYNHCGGNVELPM	34	0	1	1	0	1	1	0	2	0.0588235	7	6	6	3	0	22	0.647059
C1	MNMSPTPAALRGAGGLSESDPGRALPTLAPVAATPAVVAGVAVGVALVNAFVAGYNHCGGNVELPM	PVAATP	ATPAVVAGVAVGVALVNAFVAGYNHCGGNVELPM	34	0	1	1	0	1	1	0	2	0.0588235	7	5	8	2	0	22	0.647059
C1	MPEFRQPGWTRGVAPLDESAGGQVFGGASPVAATPAVVATAGAVVVAFAAGVAARHLANGGNVELPM	PVAATP	ATPAVVATAGAVVVAFAAGVAARHLANGGNVELPM	35	0	2	0	0	0	2	0	2	0.0571429	11	4	7	2	0	24	0.685714
C1	MPEFRQPGWTRGVAPLDESAGGQVFGGASPVAATPAVVATAGAVVVAFAAGVAARHLANGGNVELPM	PVAATP	ATPAVVATAGAVVVAFAAGVAARHLANGGNVELPM	35	0	2	0	0	0	2	0	2	0.0571429	11	4	7	2	0	24	0.685714
C1	MARSTPFAQRAVSGPLLEDSPGDIGTAASPVLATPAAAAAFAAGATIVVGAYVVGRMVGGETEPVIQ	PVLATP	ATPAAAAAFAAGATIVVGAYVVGRMVGGETEPVIQ	35	0	3	0	0	0	3	0	3	0.0857143	10	5	6	0	2	23	0.657143
C1	MAKIAAFMNQQDMGPIAESELSVGGTPVMATPAVVAVPASVKITAGIVAFTIPVGAYVTGRVVN	PVMATP	ATPAVVAVPASVKITAGIVAFTIPVGAYVTGRVVN	35	1	4	0	0	0	4	0	4	0.114286	7	3	9	0	3	22	0.628571
C1	MNSITESVRVIAGTTLSEDSGERTTRMMPVAFTPAVLVTTPYAAGGLAAGAAAVGAYEAGRAAAKG	PVAFTP	FTPAVLVTTPYAAGGLAAGAAAVGAYEAGRAAAKG	35	0	3	0	0	0	3	0	3	0.0857143	13	6	3	2	0	24	0.685714
C1	MNSITESVRVIAGATLSEDSGERTTRMMPVAFTPAVLVTTPYAAGGLAAGAAAVGAYEAGRAAAKG	PVLATP	FTPAVLVTTPYAAGGLAAGAAAVGAYEAGRAAAKG	35	0	3	0	0	0	3	0	3	0.0857143	13	6	3	2	0	24	0.685714
C1	MPEFRQPGWTRGVAPLDESAGGQVFGGASPVAATPAVVATAGAVVVAFAAGVAARHLANGGNVELPM	PVLATP	ATPAVVATAGAVVVAFAAGVAARHLANGGNVELPM	35	0	2	0	0	0	2	0	2	0.0571429	11	4	7	2	0	24	0.685714
C1	MPEFRQPGWTRGIAPLDEGAGGQVFGGASPVAATPAVVATAGAVVVAFAAGVAARHLANGGNVELPM	PVAATP	ATPAVVATAGAVVVAFAAGVAARHLANGGNVELPM	35	0	2	0	0	0	2	0	2	0.0571429	11	4	7	2	0	24	0.685714
C1	MTHIIESVRSITEPTLTEGQKDRLTRTMPVAFTPAVLVTTPYAGGGLAAGAAVVGAYELGRAAGGK	PVAFTP	FTPAVLVTTPYAGGGLAAGAAVVGAYELGRAAGGK	35	0	3	0	0	0	3	0	3	0.0857143	9	8	4	3	0	24	0.685714
C1	MPEFREPGWTRGIAPLQEDAGGQVFGGASPVAATPAVVATAGAVVVAFAAGVAARHLANGGNVELPM	PVAATP	ATPAVVATAGAVVVAFAAGVAARHLANGGNVELPM	35	0	2	0	0	0	2	0	2	0.0571429	11	4	7	2	0	24	0.685714
C1	MPEFRQPGWTRGLAPLDEGAGGQVFGGASPVAATPAVVATAGAVVVAFAAGVAARHLANGGNVELPM	PVAATP	ATPAVVATAGAVVVAFAAGVAARHLANGGNVELPM	35	0	2	0	0	0	2	0	2	0.0571429	11	4	7	2	0	24	0.685714
C1	MPEFRQPGWTRGIAPLDEGAGGQVFGGASPVAATPAVVATAGAVVVAFAAGVAARHLANGGNVELPM	PVAATP	ATPAVVATAGAVVVAFAAGVAARHLANGGNVELPM	35	0	2	0	0	0	2	0	2	0.0571429	11	4	7	2	0	24	0.685714
C1	MNSITESVRVIAGATLSQDTGERTTRMMPVAFTPAVLVTTPYAAGGLAAGAAAVGAYEAGRAAAKG	PVAFTP	FTPAVLVTTPYAAGGLAAGAAAVGAYEAGRAAAKG	35	0	3	0	0	0	3	0	3	0.0857143	13	6	3	2	0	24	0.685714
C1	MAKIAAFMNQQDMGPIAESGLSVGGTPVMATPAVVAVPASVKITAGIVAFTIPVGAYVTGRVVN	PVMATP	ATPAVVAVPASVKITAGIVAFTIPVGAYVTGRVVN	35	1	4	0	0	0	4	0	4	0.114286	7	3	9	0	3	22	0.628571
C1	MAKIAAFMNQQDMGPIAESGLSVGGTPVMATPAVVAVPASVKITAGIVAFTIPVGAYVTGRVVN	PVMATP	ATPAVVAVPASVKITAGIVAFTIPVGAYVTGRVVN	35	1	4	0	0	0	4	0	4	0.114286	7	3	9	0	3	22	0.628571
C1	MAEIAAFMNRQEMSPLEEGMAKTDGTPIMATPAAVAIPAGAKIAAAAVAFTIPVGAYVTGRVFG	PIMATP	ATPAAVAIPAGAKIAAAAVAFTIPVGAYVTGRVFG	35	0	3	0	0	0	3	0	3	0.0857143	12	4	5	0	3	24	0.685714
C1	MPEFRQPGWTRGIAPLDEGSGGQVFGAASPVAATPVVVASAGAVVIAFAAGVAARELANGGNVELPM	PVAATP	ATPVVVASAGAVVIAFAAGVAARELANGGNVELPM	35	1	1	0	0	0	1	0	1	0.0285714	10	4	7	2	1	24	0.685714
C1	MPEFRQPGWTRGIAPLDESAGGQVFGGASPVAATPAVVATAGAVVIAFAAGVAARQLANGGNVELPM	PVAATP	ATPAVVATAGAVVIAFAAGVAARQLANGGNVELPM	35	0	2	0	0	0	2	0	2	0.0571429	11	4	6	2	1	24	0.685714
C1	MPEFRQPGWTRGLAPLDEGAGGQVFGGASPVAATPAVVATAGAVVVAFAAGVAARHLANGGNVELPM	PVAATP	ATPAVVATAGAVVVAFAAGVAARHLANGGNVELPM	35	0	2	0	0	0	2	0	2	0.0571429	11	4	7	2	0	24	0.685714
C1	MPEFRQPGWTRGIAPLQEGAGGQVFGGASPVAATPVVVAGAGAVVVAFAAGVAARTLANGGNIELPM	PVAATP	ATPVVVAGAGAVVVAFAAGVAARTLANGGNIELPM	35	0	2	0	0	0	2	0	2	0.0571429	10	5	7	2	1	25	0.714286
C1	MPEFREPGWTRGIAPLQEGAGGQVFGGASPVAATPAVVATAGAVVVAFAAGVAARHLANGGNVELPM	PVAATP	ATPAVVATAGAVVVAFAAGVAARHLANGGNVELPM	35	0	2	0	0	0	2	0	2	0.0571429	11	4	7	2	0	24	0.685714
C1	MNEKASYDLAYGAVAPSSAARINPVLATPGLVAFGAAFAKGAAAGGAVVAAGIAAYTVTGDS	PLAATP	ATPGLVAFGAAFAKGAAAGGAVVAAGIAAYTVTGDS	36	1	3	0	0	0	3	0	3	0.0833333	13	7	4	1	1	26	0.722222
C1	MSDIAAYFNARQDLGGIGSAHVPAADAPLLATPATITTIAGWKAVGAFAAGAGCVVGAYTAGKANG	PLLATP	ATPATITTIAGWKAVGAFAAGAGCVVGAYTAGKANG	36	0	5	1	0	1	5	0	6	0.166667	11	7	3	0	2	23	0.638889
C1	MSTLADHTNTISPGRFGDLTETTRGRGLTAATPVLATPSAVALGVAIGMAAFHAGYMYGIARSMAEGTVAN	PVLATP	ATPSAVALGVAIGMAAFHAGYMYGIARSMAEGTVAN	36	2	2	0	0	0	3	0	3	0.0833333	10	5	3	1	2	21	0.583333
C1	MRTQVRPHWDIVPGALEEDAEGQVFESGLPVTATPVVVGAAGAIVVAYAAGALANALGGGTHPTLPHA	PVTATP	ATPVVVGAAGAIVVAYAAGALANALGGGTHPTLPHA	36	0	3	0	0	0	3	0	3	0.0833333	11	6	5	3	1	26	0.722222
C1	MRTVTTPTLTGDAGISLKPMMPVTFTPAILVTTPYAAGGLAAGAASVAAYEAGRAAGAGK	PVTFTP	FTPAILVTTPYAAGGLAAGAASVAAYEAGRAAGAGK	36	1	3	0	0	0	3	0	3	0.0833333	13	6	2	2	1	24	0.666667
C1	MRTVTTPTLTGDAGISLKPMMPVTFTPAILVTTPYAAGGLAAGAASVAAYEAGRAAGAGK	PVTFTP	FTPAILVTTPYAAGGLAAGAASVAAYEAGRAAGAGK	36	1	3	0	0	0	3	0	3	0.0833333	13	6	2	2	1	24	0.666667
C1	MSFARLPADLAAMPGLREDDAGLPPSTLVPVTSTSCAAASAVSAVVRAAAWVADAIGPVRPSA	PSTLVP	LVPVTSTSCAAASAVSAVVRAAAWVADAIGPVRPSA	36	5	2	1	0	1	6	0	7	0.194444	11	1	7	1	1	21	0.583333
C1	MSTLADYTNTISPGKFGDLTETTGGRGLTAATPVLATPSAVALGVAIGMAAFHAGYMYGIARSMAEGTVAN	PVLATP	ATPSAVALGVAIGMAAFHAGYMYGIARSMAEGTVAN	36	2	2	0	0	0	3	0	3	0.0833333	10	5	3	1	2	21	0.583333
C1	MSVLTERVNASSVLAELPLRADRAQQMDELAPVLATPATAVAFAAGVGVGVAVTNAFGAGLAAGGSKQPS	PVLATP	ATPATAVAFAAGVGVGVAVTNAFGAGLAAGGSKQPS	36	2	3	0	0	0	4	0	4	0.111111	11	7	5	1	0	24	0.666667
C1	MSDPLASVNSSRYLKTVPVRAERSTWLGRKDGSPVMLLPTIVTPAIVTGTVNVATQVVAQVTGVRQPDPNATDPSNLA	PTIATP	VTPAIVTGTVNVATQVVAQVTGVRQPDPNATDPSNLA	37	1	6	0	0	0	6	0	6	0.162162	5	2	8	1	1	17	0.459459
C1	MTEIVSFVNGLDLGAIETGEAHSDQAPVLATPAAALAAIGGAKAVGAFVGGATVVGGAYALGRAVG	PVLATP	ATPAAALAAIGGAKAVGAFVGGATVVGGAYALGRAVG	37	0	2	0	0	0	2	0	2	0.0540541	13	9	5	2	1	30	0.810811
C1	MVEIVSYFNEKLDLGAIDQGESNSEQSPVLATPAAALAAIGGAKVVGAFVGGATLVGGAYALGKAVG	PVLATP	ATPAAALAAIGGAKVVGAFVGGATLVGGAYALGKAVG	37	0	2	0	0	0	2	0	2	0.0540541	12	9	5	3	1	30	0.810811
C1	MTEIVTFVNNLDLGTIQAGETRTDQAPVLATPAAALAAIGGAKAVGAFVGGATVVGGAYALGRAIG	PVLATP	ATPAAALAAIGGAKAVGAFVGGATVVGGAYALGRAIG	37	0	2	0	0	0	2	0	2	0.0540541	13	9	4	2	2	30	0.810811
C1	MTEIVTFVNNLDLGTIQAGETRTDQAPVLATPAAALAAIGGAKAVGAFVGGATVVGGAYALGRAIG	PVLATP	ATPAAALAAIGGAKAVGAFVGGATVVGGAYALGRAIG	37	0	2	0	0	0	2	0	2	0.0540541	13	9	4	2	2	30	0.810811
C1	MTEIVSFVNGLDLGAIETGEAHSDQAPVLATPAAALAAIGGAKAVGAFVGGATVVGGAYALGRAVG	PVLATP	ATPAAALAAIGGAKAVGAFVGGATVVGGAYALGRAVG	37	0	2	0	0	0	2	0	2	0.0540541	13	9	5	2	1	30	0.810811
C1	MPLLAEKANADPALAAISIYSTEPCHEIGGAPVLATPATIVGVAAGVGLVGSVVGLFAAGYAIGHSGTLPK	PVLATP	ATPATIVGVAAGVGLVGSVVGLFAAGYAIGHSGTLPK	37	2	3	0	0	0	4	0	4	0.108108	7	8	6	3	2	26	0.702703
C1	MTLLAEKVNADPALTAISIYSTEPCHEIGGAPVLATPATIVGVAAGVGLVGSVVGLFAAGYAFGHSGTLPK	PVLATP	ATPATIVGVAAGVGLVGSVVGLFAAGYAFGHSGTLPK	37	2	3	0	0	0	4	0	4	0.108108	7	8	6	3	1	25	0.675676
C1	MSTLVRHANEISPDLFGDLDAQTGARSLSGMTPVMATPTAVALGIAISAVAFHAGYMYGIARNMAEGSVVLPQ	PVMATP	ATPTAVALGIAISAVAFHAGYMYGIARNMAEGSVVLPQ	38	2	2	0	0	0	3	0	3	0.0789474	9	4	4	2	3	22	0.578947
C1	MTALVAHTNEISAEMFGELTEDRTAEGLAGLTPVLATPTAVALGVAVGAVAFHAGYMVGIARNMAEGTRPRPQ	PVLATP	ATPTAVALGVAVGAVAFHAGYMVGIARNMAEGTRPRPQ	38	0	3	0	0	0	3	0	3	0.0789474	9	5	5	1	1	21	0.552632
C1	MNQMTALVDHTNDISLEMFGELTEADRNAHGLAGLTPVLATPTAVALGVAVGAVAFHAGYMVGIARNMAEGTRPLPK	PVLATP	ATPTAVALGVAVGAVAFHAGYMVGIARNMAEGTRPLPK	38	0	3	0	0	0	3	0	3	0.0789474	9	5	5	2	1	22	0.578947
C1	MNDFLLIPSVVALGIVGFLIATRAVSTPAVIGVALVVLWGACSQARAHTHARHTPSKKRRQHP	RAVSTP	STPAVIGVALVVLWGACSQARAHTHARHTPSKKRRQHP	38	3	3	1	0	1	5	0	6	0.157895	6	2	4	2	1	15	0.394737
C1	MNDFLLIPSVVALGIVGFLIATRAVSTPAVIGVALVVLWGACAQARSTVHPRHTPSKKRRQHP	RAVSTP	STPAVIGVALVVLWGACAQARSTVHPRHTPSKKRRQHP	38	3	3	1	0	1	5	0	6	0.157895	5	2	5	2	1	15	0.394737
C1	MNDFLLIPSVVALGIVGFLIATRAVSTPAVIGVALVVLWGACSQARSTIHARHTPSKKRRQHP	RAVSTP	STPAVIGVALVVLWGACSQARSTIHARHTPSKKRRQHP	38	4	3	1	0	1	6	0	7	0.184211	5	2	4	2	2	15	0.394737
C1	MNDVSFLTRPGALTDIKVDDPQGRVIITQTPVMATPAVVAGVIIGAALVNAFVAGRDGGPLEPPIDVSVPS	PVMATP	ATPAVVAGVIIGAALVNAFVAGRDGGPLEPPIDVSVPS	38	2	1	0	0	0	2	0	2	0.0526316	7	5	7	2	3	24	0.631579
C1	MNDTSFLTRPGALTDIRVDDPQGRVIINHPPVMATPAVVSGVIIGVALVNAFVAGRDGGPLEPPIEIDVPA	PVMATP	ATPAVVSGVIIGVALVNAFVAGRDGGPLEPPIEIDVPA	38	1	1	0	0	0	1	0	1	0.0263158	6	5	7	2	4	24	0.631579
C1	MLEKVNASAVFADIPLRADVPMTVGAASPVLATPATIVGIAAGVAVVAGVAGAFYAGYQIGRAIGHQNPLPQ	PVLATP	ATPTAVALGIAISAVAFHAGYMYGIARNMAEGSVVLPQ	38	2	2	0	0	0	3	0	3	0.0789474	9	4	4	2	3	22	0.578947
C1	MNDFLLVPFVVALGIVGFLIATRAVSTPAVIGVALVVLLGACSQARRNVHPKNTPAKKRRQHP	RAVSTP	STPAVIGVALVVLLGACSQARRNVHPKNTPAKKRRQHP	38	2	2	1	0	1	3	0	4	0.105263	5	2	5	3	1	16	0.421053
C1	MNDTSFLTRPGALTDIRVDDPQGRVIINHPPVMATPAVVSGVIIGVALVNAFVAGRDGGPLEPPIEIDVPA	PVMATP	ATPAVVSGVIIGVALVNAFVAGRDGGPLEPPIEIDVPA	38	1	1	0	0	0	1	0	1	0.0263158	6	5	7	2	4	24	0.631579
C1	MTALVDHTNDVSLEMFGELNEADRTAQGLAGLTPVLATPTAVALGVAVGAVAFHAGYMVGIVRNMAEGTVTPRPK	PVLATP	ATPTAVALGVAVGAVAFHAGYMVGIVRNMAEGTVTPRPK	39	0	4	0	0	0	4	0	4	0.102564	8	5	7	1	1	22	0.564103
C1	MSRTTAYLNGCAALADLSVLDSAGRRSPAQPVLATPVTIVAFAGGVGAGAAIVAAFEAGRQAAGGSMEPIIT	PVLATP	ATPVTIVAFAGGVGAGAAIVAAFEAGRQAAGGSMEPIIT	39	1	3	0	0	0	3	0	3	0.0769231	11	7	4	0	4	26	0.666667
C1	MSRTTAYLNGCAALADLSVLDSAGRRSPAQPVLATPVTIVAFAGGVGAGAAIVAAFEAGRQAAGGSMEPIIT	PVLATP	ATPVTIVAFAGGVGAGAAIVAAFEAGRQAAGGSMEPIIT	39	1	3	0	0	0	3	0	3	0.0769231	11	7	4	0	4	26	0.666667
C1	MTAVAEFMNAQEINFEGGSMSTAGAPVLGTPAAAAPVAVATCWKVAGGVAGFGAVVGAAAALFTVANGD	PVLGTP	GTPAAAAPVAVATCWKVAGGVAGFGAVVGAAAALFTVANGD	41	0	3	1	0	1	3	0	4	0.097561	14	7	7	1	0	29	0.707317
C1	MSVLATKVNADPALAAIPIHSDEACNQVGGMPVLATPATIVGVAAGVGLVGSVAALFGAGYVVGRNLGGTTPRPK	PVLATP	ATPATIVGVAAGVGLVGSVAALFGAGYVVGRNLGGTTPRPK	41	1	4	0	0	0	4	0	4	0.097561	7	9	7	3	1	27	0.658537
C1	MGKTMTSLASRVNSDRSIANLQMDRTNWSGAPGELPVLATPATVTAAAAFVAANKGAVAGAAAFAGLFGAGVWVGVATAD	PVLATP	ATPATVTAAAAFVAANKGAVAGAAAFAGLFGAGVWVGVATAD	42	0	4	0	0	0	4	0	4	0.0952381	17	6	6	1	0	30	0.714286
C1	MTSLVDYTNAVSPEMFGDLRETAEGHGLTAASPVLATPTAVALGVAIGAVAFHAGYMYGIARNMAEGKYPQPKQLPQ	PVLATP	ATPTAVALGVAIGAVAFHAGYMYGIARNMAEGKYPQPKQLPQ	42	0	2	0	0	0	2	0	2	0.047619	9	5	3	2	2	21	0.5
C1	MMTMTMMSRDAALSARVGAAVAAIPDDGPFGNAVSAPVLGTPATVAAAPAAVATWKLAAAAVGGGVSVVGAYVAGRAVGTW	PVLGTP	GTPATVAAAPAAVATWKLAAAAVGGGVSVVGAYVAGRAVGTW	42	1	4	0	0	0	4	0	4	0.0952381	14	7	8	1	0	30	0.714286
C1	MSVLATRVNTDPDLAAIPIDSGEACSQVGGMPVLATPATIVSVAAGVGLVGSVAALFGAGYVAGRNLGGTRPPVQN	PVLATP	ATPATIVSVAAGVGLVGSVAALFGAGYVAGRNLGGTRPPVQN	42	2	3	0	0	0	4	0	4	0.0952381	8	8	7	3	1	27	0.642857
C1	MSVLANRVNADPALATIPIHSDEARNHVGGMPVLATPATIVSVAAGVGLVGSVAALFGAGYVAGRNLGGTRPPAPK	PVLATP	ATPATIVSVAAGVGLVGSVAALFGAGYVAGRNLGGTRPPAPK	42	2	3	0	0	0	4	0	4	0.0952381	9	8	6	3	1	27	0.642857
C1	MPLLAEKVNADPALGAISIHSTEPCHEIGGAPVLATPATIVGVAAGVGLVGSVVGLFAAGYAMGRNFGGTRPPKSEQLPS	PVLATP	ATPATIVGVAAGVGLVGSVVGLFAAGYAMGRNFGGTRPPKSEQLPS	46	3	3	0	0	0	5	0	5	0.108696	7	9	6	3	1	26	0.565217
C1	MTEMISKVNRSAVLAGTPVDLDRPAYVGATAPVTSVGFAAGGGGGVDVAGMGGDANFAAAAGAF	VLAGTP	GTPVDLDRPAYVGATAPVTSVGFAAGGGGGVDVAGMGGDANFAAAAGAF	49	1	3	0	0	0	3	0	3	0.0612245	12	12	6	1	0	31	0.632653
C1	MTNSIESFANDFADSTLRPLELSPAVGPVLATPAYAAYATGVAVTFTLGIISDAVGYTDADDVLDGDTPEGASADQLIRARIDGLQ	PVLATP	ATPAYAAYATGVAVTFTLGIISDAVGYTDADDVLDGDTPEGASADQLIRARIDGLQ	56	2	6	0	0	0	7	0	7	0.125	11	6	4	4	4	29	0.517857
C1	MNPIEKHAHEAFSGSDPLRPLEVPSDAAPVLATPALGYGALTFAAFMAGNVVTDFVGDESPTEGGIDELVGKSGSELLALRAERLTRG	PVLATP	ATPALGYGALTFAAFMAGNVVTDFVGDESPTEGGIDELVGKSGSELLALRAERLTRG	57	3	5	0	0	0	7	0	7	0.122807	8	9	4	7	1	29	0.508772
C1	MSNVEAFANEHVDGVLSPLEVTTAVGPVLATPAYAGYAAGAGAVFTLGLISDAIESHHAAEVTPTGPVPSYGSVDQLLGMRVASIS	PVLATP	ATPAYAGYAAGAGAVFTLGLISDAIESHHAAEVTPTGPVPSYGSVDQLLGMRVASIS	57	6	4	0	0	0	9	0	9	0.157895	11	7	5	4	3	30	0.526316
C1	MAVSRTTRIADWAQHHAEFGERHVPRSEEPLPVLLTPAIVFAGVTAAQTAAQVGLTAAAGALGYDDHGSTVPSTALDTGRSVGDTLAHHPQRF	PVLLTP	LTPAIVFAGVTAAQTAAQVGLTAAAGALGYDDHGSTVPSTALDTGRSVGDTLAHHPQRF	59	3	8	0	0	0	10	0	10	0.169492	12	7	5	5	1	30	0.508475
C1	MSSIENALNSVEIPVEGVVYVAARPTLGTPRIARIGRIAQAAEGIGAVAAAATAAVGVAQAAEANNLAAEANAQNQAALAAVGGAPAA	PTLGTP	GTPRIARIGRIAQAAEGIGAVAAAATAAVGVAQAAEANNLAAEANAQNQAALAAVGGAPAA	61	0	2	0	0	0	2	0	2	0.0327869	26	7	4	2	4	43	0.704918
C1	MEIPVEGVVYVAARPTLGTPRIARIGRIAQAAEGVGALAAAATAAVGVAQAAEANNLAAEANAQNQAALAAVGGTPPAV	PTLGTP	GTPRIARIGRIAQAAEGVGALAAAATAAVGVAQAAEANNLAAEANAQNQAALAAVGGTPPAV	62	0	3	0	0	0	3	0	3	0.0483871	24	7	5	3	3	42	0.677419
C1	MSSIENALNSVEIPVEGVVYVAARPTLGTPRIARIGRIAQAAEGVGAIAAAATAAVGVAQAAEANNLAAEANAQNAAALAAVGGTPPAV	PTLGTP	GTPRIARIGRIAQAAEGVGAIAAAATAAVGVAQAAEANNLAAEANAQNAAALAAVGGTPPAV	62	0	3	0	0	0	3	0	3	0.0483871	25	7	5	2	4	43	0.693548
C1	MPITRESRAARWAQENAGEWCGHRVPEADEAVPVLTTPIFATFAVAGAAGAGLGAARVVGGITGHIVGAVPPPGSNEVSGYLEAGRPVKELLANHPAI	PVLTTP	TTPIFATFAVAGAAGAGLGAARVVGGITGHIVGAVPPPGSNEVSGYLEAGRPVKELLANHPAI	63	2	4	0	0	0	5	0	5	0.0793651	12	11	7	4	4	38	0.603175
C1	MEIPVEGVVYVAARPTLGTPRIARVGNRLGGLAQAAEGVGAIGALATAAVGVGQAAEANNLAAEANAQNAAALAAVGGAPAA	PTLGTP	GTPRIARVGNRLGGLAQAAEGVGAIGALATAAVGVGQAAEANNLAAEANAQNAAALAAVGGAPAA	65	0	2	0	0	0	2	0	2	0.0307692	24	11	5	5	2	47	0.723077
C1	MEIPVEGVVYVAARPTLGTPRIARVGNRLGGLAQAAEGVGAIGALATAAVGVGQAAEANNLAAEANAQNAAALAAVGGAPAA	PTLGTP	GTPRIARVGNRLGGLAQAAEGVGAIGALATAAVGVGQAAEANNLAAEANAQNAAALAAVGGAPAA	65	0	2	0	0	0	2	0	2	0.0307692	24	11	5	5	2	47	0.723077
C1	MSSIENALNSVEIPVEGVVYVAARPTLGTPRIARVGNRLGGLAQAAEGVGAIGALATAAVGVGQAAEANNLAAEANAQNAAALAAVGGAPAA	PTLGTP	GTPRIARVGNRLGGLAQAAEGVGAIGALATAAVGVGQAAEANNLAAEANAQNAAALAAVGGAPAA	65	0	2	0	0	0	2	0	2	0.0307692	24	11	5	5	2	47	0.723077
C1	MEIPVEGVVYVAARPTLGTPRIARVGNRLGGLAQAAEGVGAIGALATAAVGVGQAAEANNLAAEANAQNAAALAAVGGAPPAA	PTLGTP	GTPRIARVGNRLGGLAQAAEGVGAIGALATAAVGVGQAAEANNLAAEANAQNAAALAAVGGAPPAA	66	0	2	0	0	0	2	0	2	0.030303	24	11	5	5	2	47	0.712121
C1	MDLPLEEIILTSARPTLGTPRIGRGARAVQAAQVAGGLGEAAGGAANVAAAASAVEANQAAVEANQAVEAQANAANAQAAGGV	PTLGTP	GTPRIGRGARAVQAAQVAGGLGEAAGGAANVAAAASAVEANQAAVEANQAVEAQANAANAQAAGGV	66	1	1	0	0	0	1	0	1	0.0151515	26	10	7	1	1	45	0.681818
C1	MDLPVEGVILASARPTLGTPRIGRVSGANALNALGGLADLAQAAGGVAQVVGAASAVEANNAAVDANQAVANAANAQAAAVGGAV	PTLGTP	GTPRIGRVSGANALNALGGLADLAQAAGGVAQVVGAASAVEANNAAVDANQAVANAANAQAAAVGGAV	68	2	1	0	0	0	2	0	2	0.0294118	24	10	9	4	1	48	0.705882
C1	MDLPVEGVILTSARPTLGTPRIGRVANAANALNALGGLADLAQAAGGVAQVVGAASAVEANQAAADANQAVANAANAQAAAAGGTV	PTLGTP	GTPRIGRVANAANALNALGGLADLAQAAGGVAQVVGAASAVEANQAAADANQAVANAANAQAAAAGGTV	69	1	2	0	0	0	2	0	2	0.0289855	27	9	7	4	1	48	0.695652
C1	MDIPVEAVILASARPTLGTPRIGRVSGANALNALAGLADLAQAAGGVASVVGAASAVEANNAAAEANQAVANAANAQAAAAGGVPA	PTLGTP	GTPRIGRVSGANALNALAGLADLAQAAGGVASVVGAASAVEANNAAAEANQAVANAANAQAAAAGGVPA	69	3	1	0	0	0	3	0	3	0.0434783	27	9	7	4	1	48	0.695652
C1	VDNLNLPVEGIILASARPTLGTPRIGRVGRGAGGGGGRGLAALGAIADLAGVAGGVGATVGAASSVEAANASVAADQAVAQAAADVAAGAGAPPA	PTLGTP	GTPRIGRVGRGAGGGGGRGLAALGAIADLAGVAGGVGATVGAASSVEAANASVAADQAVAQAAADVAAGAGAPPA	75	3	2	0	0	0	4	0	4	0.0533333	25	18	8	3	2	56	0.746667
C2	MDSLTSIVNHDERLDALHIASTQTEILSETTVPVLGTPAALAASVAVATAIHSIW	PVLGTP	GTPAALAASVAVATAIHSIW	20	2	2	0	0	0	3	0	3	0.15	7	1	2	1	2	13	0.65
C2	MTELITQVNESEVLTETAISADEGRVFPGATPVLATPAAFLGGVAVSCAVVGAFEAGRG	PVLATP	ATPAAFLGGVAVSCAVVGAFEAGRG	25	1	1	1	0	1	1	0	2	0.08	7	5	4	1	0	17	0.68
C2	MFLNKVNQDVSLEDFVAERGPEARIAPIMATPAIFTPAAVKVGVSAGAAAAAYMATKVK	PIMATP	ATPAIFTPAAVKVGVSAGAAAAAYMATKVK	30	1	3	0	0	0	3	0	3	0.1	11	2	4	0	1	18	0.6
C2	MLLDKVNQDVSLAGFVAEHGPGARIAPVMATPAIFTPAAVKVGACVGAAVATYVATKAVK	PVMATP	ATPAIFTPAAVKVGACVGAAVATYVATKAVK	31	0	4	1	0	1	4	0	5	0.16129	10	2	6	0	1	19	0.612903
C2	MLLDKVNQDVSLAGFVAEHGPGARIAPVMATPAIFTPAAVKAGACVGVAVATYMATKAVK	PVMATP	ATPAIFTPAAVKAGACVGVAVATYMATKAVK	31	0	4	1	0	1	4	0	5	0.16129	10	2	5	0	1	18	0.580645
C2	MLLEKVNNSHLLDTVLTDAANAEDLSPAEPVLSTPAAVAGGALVTAGAFGAGVGLGVTQAQAG	PVLSTP	STPAAVAGGALVTAGAFGAGVGLGVTQAQAG	31	1	3	0	0	0	3	0	3	0.0967742	9	8	4	2	0	23	0.741935
C2	MTAADRVPALRDLSPLTENSPGQAPGSATAVLATPTPAAMIVIAYAAFEVGRMVCGTTEPVIQ	AVLATP	ATPTPAAMIVIAYAAFEVGRMVCGTTEPVIQ	31	0	4	1	0	1	4	0	5	0.16129	6	2	4	0	3	15	0.483871
C2	MLLHKVNQNASLTGSLSQRTLEGAVSPVMATPSLVFTPCAGKAAVLVTAAAVGYATAKVK	PVMATP	ATPSLVFTPCAGKAAVLVTAAAVGYATAKVK	31	1	4	1	0	1	4	0	5	0.16129	9	2	5	2	0	18	0.580645
C2	MPILLDKVNSDPALKEMLQLRASRSEAPVLATPAALAWAAGAALGGGSVGGAAYAAYRAVAN	PVLATP	ATPAALAWAAGAALGGGSVGGAAYAAYRAVAN	32	1	1	0	0	0	1	0	1	0.03125	14	6	2	2	0	24	0.75
C2	MQILLDKVNSDPTLKGSLRLRASRVGTPVLATPAALAWAAGAAVGAGAVSGAAYGAYRVAAR	PVLATP	ATPAALAWAAGAAVGAGAVSGAAYGAYRVAAR	32	1	1	0	0	0	1	0	1	0.03125	15	5	3	1	0	24	0.75
C2	MLLEKVNNSHLLEAVSMDVANVEDLSSAEPVLSTPAAAAGGALVTAGAFGAGVGLGVTQAQADG	PVLSTP	STPAAAAGGALVTAGAFGAGVGLGVTQAQADG	32	1	3	0	0	0	3	0	3	0.09375	10	8	3	2	0	23	0.71875
C2	MLLEKVNNSHLLEAVSMDAANVEDLSSAEPVLSTPAAAAGGALVTAGAFGAGVGLGVTQAQADG	PVLSTP	STPAAAAGGALVTAGAFGAGVGLGVTQAQADG	32	1	3	0	0	0	3	0	3	0.09375	10	8	3	2	0	23	0.71875
C2	MLLEKVNNSHLLEAVPMDAANVEDLSSAEPVLSTPAAAAGGALVTAGAFGAGVGLGVTQAQADG	PVLSTP	STPAAAAGGALVTAGAFGAGVGLGVTQAQADG	32	1	3	0	0	0	3	0	3	0.09375	10	8	3	2	0	23	0.71875
C2	MAGPSLARQWAHLGPLHENSPGEVGRAASPVLATPSAFAAGMGIVVGAYVVGRMIGSETEPVIQ	PVLATP	ATPSAFAAGMGIVVGAYVVGRMIGSETEPVIQ	32	2	2	0	0	0	3	0	3	0.09375	5	5	5	0	3	18	0.5625
C2	MSVLIEKVNAGAARAAESPVAPVMATPAAFTVGFVGGAKATAIIVAAAGVGAAVKACQK	PVMATP	ATPAAFTVGFVGGAKATAIIVAAAGVGAAVKACQK	35	0	3	1	0	1	3	0	4	0.114286	12	5	5	0	2	24	0.685714
C2	MSVLVEKVNAGVGRPVEDEAAPVMATPAAFAAGVVAGAKASAILVAAAGVGAAVANAQK	PVMATP	ATPAAFAAGVVAGAKASAILVAAAGVGAAVANAQK	35	1	1	0	0	0	1	0	1	0.0285714	16	4	5	1	1	27	0.771429
C2	MNRITESVRGIADAALSEDTGERTSRMMPVAFTPAVLVVCPYAAGGLAAGAAAVGAYEAGRAAAKG	PVAFTP	FTPAVLVVCPYAAGGLAAGAAAVGAYEAGRAAAKG	35	0	1	1	0	1	1	0	2	0.0571429	13	6	4	2	0	25	0.714286
C2	MSVLLDKVNAGVGQASDVQIAPVMATPAAFVAGVVAGGKVCAVLTAAAGVGAAVKSAQK	PVMATP	ATPAAFVAGVVAGGKVCAVLTAAAGVGAAVKSAQK	35	1	2	1	0	1	2	0	3	0.0857143	12	5	7	1	0	25	0.714286
C2	MSVLVEKVNAGAGHAADGSIAPVMATPAAFVAGVVAGGKVSAVITAAAGVGAAVKACQK	PVMATP	ATPAAFVAGVVAGGKVSAVITAAAGVGAAVKACQK	35	1	2	1	0	1	2	0	3	0.0857143	12	5	7	0	1	25	0.714286
C2	MSVLVEKVNAGAGQAADGSVAPVMATPAAFVAGVVAGGKVSAVITAAAGVGAAVKAAQK	PVMATP	ATPAAFVAGVVAGGKVSAVITAAAGVGAAVKAAQK	35	1	2	0	0	0	2	0	2	0.0571429	13	5	7	0	1	26	0.742857
C2	MSVLVEKVNAGAGQAADGSVAPVMATPAAFVAGVVAGGKVSAVMTAAAGVGAAVKAAQK	PVMATP	ATPAAFVAGVVAGGKVSAVMTAAAGVGAAVKAAQK	35	1	2	0	0	0	2	0	2	0.0571429	13	5	7	0	0	25	0.714286
C2	MSRLSTLVNNDQITLEQVHSPVMATPAAFGAGVVAGAKACGALVAAAGVGAAIATATKE	PVMATP	ATPAAFGAGVVAGAKACGALVAAAGVGAAIATATKE	36	0	3	1	0	1	3	0	4	0.111111	15	6	4	1	1	27	0.75
C2	MSRLSTLVNNDQITLEQVHSPVMATPAAFGAGVVAGAKACGALVAAAGVGAAIASATKK	PVMATP	ATPAAFGAGVVAGAKACGALVAAAGVGAAIASATKK	36	1	2	1	0	1	2	0	3	0.0833333	15	6	4	1	1	27	0.75
C2	MAKIAAFMNEQEMGPITESVVNRDGTPVMATPAAVVAVPASVKITAAVVAFTVPVGAYVAGRVVN	PVMATP	ATPAAVVAVPASVKITAAVVAFTVPVGAYVAGRVVN	36	1	3	0	0	0	3	0	3	0.0833333	10	2	11	0	1	24	0.666667
C2	MTAISIKVNASQELDGVSIHAGENEWNGRMSPVLATPAAVGAGLAGAAAVAGAGAAGIAVGNAAGQAAGG	PVLATP	ATPAAVGAGLAGAAAVAGAGAAGIAVGNAAGQAAGG	36	0	1	0	0	0	1	0	1	0.0277778	17	10	3	1	1	32	0.888889
C2	MTAVSTKVNASQELNGVSIHAGENEWNGRMSPVLATPAAVGAGLAGAAAIAGAAAGGIAVGNAAGQAAGG	PVLATP	ATPAAVGAGLAGAAAIAGAAAGGIAVGNAAGQAAGG	36	0	1	0	0	0	1	0	1	0.0277778	17	10	2	1	2	32	0.888889
C2	MSVLVEKVNSGAGRRTEDPVAPVMATPAAFVAGVVAGAKAAGALVAAAGVGAAVGAAVKK	PVMATP	ATPAAFVAGVVAGAKAAGALVAAAGVGAAVGAAVKK	36	0	1	0	0	0	1	0	1	0.0277778	16	6	7	1	0	30	0.833333
C2	MTAISTKVNASQELDGVSIHAGENEWNGRMSPVLATPAAVGAGLAGAAAVAGAGAAGIAVGNAAGQAAGG	PVLATP	ATPAAVGAGLAGAAAVAGAGAAGIAVGNAAGQAAGG	36	0	1	0	0	0	1	0	1	0.0277778	17	10	3	1	1	32	0.888889
C2	MSIMLERINAGEGEMTEQSIAPVMATPAAFVAGAVAGAKVSGALVAAAAGGAAVGAAVKK	PVMATP	ATPAAFVAGAVAGAKVSGALVAAAAGGAAVGAAVKK	36	1	1	0	0	0	1	0	1	0.0277778	16	6	6	1	0	29	0.805556
C2	MSATHRLLGLVNSDDVRVDGVTSPVMATPAAFAAGVVAGGKATAVVVGAAGVGAAVGNAVGGG	PVMATP	ATPAAFAAGVVAGGKATAVVVGAAGVGAAVGNAVGGG	37	0	2	0	0	0	2	0	2	0.0540541	13	10	8	0	0	31	0.837838
C2	MLTQKVNANPSLQGALEAGAPMGGAAPVMATPALIATPVIAKAAGAVVGAGAVTGAAYAAYKVATG	PVMATP	ATPALIATPVIAKAAGAVVGAGAVTGAAYAAYKVATG	37	0	4	0	0	0	4	0	4	0.108108	14	5	5	1	2	27	0.72973
C2	MLTQKVNANTSLTGALEPGTPLGGAAPVMATPALIATPAIAKAAGAVVGAGAVTGAAYAAYRAVIN	PVMATP	ATPALIATPAIAKAAGAVVGAGAVTGAAYAAYRAVIN	37	0	3	0	0	0	3	0	3	0.0810811	15	4	4	1	3	27	0.72973
C2	MLLEKVNENEALAGELTADGPVAYNVPVMATPALIATPVIAKAAGAVVGAGAVGGAAYGAYRAVVN	PVMATP	ATPALIATPVIAKAAGAVVGAGAVGGAAYGAYRAVVN	37	0	2	0	0	0	2	0	2	0.0540541	13	6	6	1	2	28	0.756757
C2	MLIQKVNLNPAVNGELHAGSPAGAAAPVMATPAIIATPVIAKTAGYVVGGAVVTGAAAVAYKTATG	PVMATP	ATPAIIATPVIAKTAGYVVGGAVVTGAAAVAYKTATG	37	0	6	0	0	0	6	0	6	0.162162	11	5	6	0	3	25	0.675676
C2	MLTHKVNADASLKGALMAGAPARGTAPVMATPAIFATPVIAKAAGAVVGAGAVTGAAYAAYKTATG	PVMATP	ATPAIFATPVIAKAAGAVVGAGAVTGAAYAAYKTATG	37	0	5	0	0	0	5	0	5	0.135135	14	5	4	0	2	25	0.675676
C2	MLIRKVNADTSLRGTLEPGSPLGGAAPVMATPALIATPVIAKAAGAVVGAGAVTGAAYVAYKTATG	PVMATP	ATPALIATPVIAKAAGAVVGAGAVTGAAYVAYKTATG	37	0	5	0	0	0	5	0	5	0.135135	13	5	5	1	2	26	0.702703
C2	MLTQKVNADASLKGALDAGAPARGTAPVMATPAIFATPVIAKAAGAVVGAGAVTGAAYAAYKVATG	PVMATP	ATPAIFATPVIAKAAGAVVGAGAVTGAAYAAYKVATG	37	0	4	0	0	0	4	0	4	0.108108	14	5	5	0	2	26	0.702703
C2	MLTQKVNADASLKGALEAGAPARGTAPVMATPAIFATPVIAKAAGAVVGAGAVTGAAYAAYKVATG	PVMATP	ATPAIFATPVIAKAAGAVVGAGAVTGAAYAAYKVATG	37	0	4	0	0	0	4	0	4	0.108108	14	5	5	0	2	26	0.702703
C2	MLATAVNSAQDRGLIPADRDGFLAIGSAPMTCTPTVTVRITVRIMRAVTRKQRGAEPAATDHKETLVAV	PMTCTP	CTPTVTVRITVRIMRAVTRKQRGAEPAATDHKETLVAV	38	0	7	1	0	1	7	0	8	0.210526	5	1	6	1	2	15	0.394737
C2	MSVLQAVNVEPRLRGDIESGPLSYSDAPVLACPLAAVGAAGVAKAAGVVVGGGAVTGVAYVAYKTVAN	PVLACP	ACPLAAVGAAGVAKAAGVVVGGGAVTGVAYVAYKTVAN	38	0	2	1	0	1	2	0	3	0.0789474	12	7	9	1	0	29	0.763158
C2	MTGQEGHRIPMSRIAAYLDDSPVLATIPVLDRTGRVSPARPVLATPVTIVAFGAGVAAGSAIVAAFEAGRTAGSSTEPIMT	PVLATP	ATPVTIVAFGAGVAAGSAIVAAFEAGRTAGSSTEPIMT	38	3	5	0	0	0	7	0	7	0.184211	10	5	4	0	3	22	0.578947
C2	MQPTAKLLEHVNHTEISIHERQGVPVLATPAAFGAGVVLGAKVSAGGIAVAGGGAALCTATVLGCGN	PVLATP	ATPAAFGAGVVLGAKVSAGGIAVAGGGAALCTATVLGCGN	40	1	3	2	0	2	3	0	5	0.125	11	10	5	3	1	30	0.75
C2	MQNRITRFADSAEITRIGRNIDAQPVLATPVTTTATTAVTCITAAFGSHDSERNDVTSSFESDETVDGLLKARVVAMSS (reverse direction)	PVLATP	ATPVTTTATTAVTCITAAFGSHDSERNDVTSSFESDETVDGLLKARVVAMSS	52	7	10	1	0	1	16	0	17	0.326923	7	2	6	2	1	18	0.346154
C2	MNGIERAAQAAVPENGGALRPLERANGTAPVLGTPALVTAAGVLYVAGNMVTDLVGQETAANSKMRGLSGKSGAELLSIRTAGLRE	PVLGTP	GTPALVTAAGVLYVAGNMVTDLVGQETAANSKMRGLSGKSGAELLSIRTAGLRE	54	4	5	0	0	0	8	0	8	0.148148	8	8	5	7	1	29	0.537037
C2	MKMNNIEKAAQAALPEQGGVLRPLERANGAAPVLGTPALVTATGVFFVAGNMVLDLVGHESAAKHDGAVPTGKSGAELLSMRANGLRG	PVLGTP	GTPALVTATGVFFVAGNMVLDLVGHESAAKHDGAVPTGKSGAELLSMRANGLRG	54	3	4	0	0	0	6	0	6	0.111111	8	9	6	6	0	29	0.537037
C2	MNGIERAAQAAVPENGGTLRPLERANGTAPVLGTPALVTAAGVLYVAGNMVTDLVGQETASTGKVRGLSGKSGAELLNIRAAGLRE	PVLGTP	GTPALVTAAGVLYVAGNMVTDLVGQETASTGKVRGLSGKSGAELLNIRAAGLRE	54	3	5	0	0	0	7	0	7	0.12963	8	9	6	7	1	31	0.574074
C2	MEAAAERDIPAVGEGVLEPLELVGVAAPVLTPFAVGVAVGAGLYAYHKWGGAEETPTGYRLDSETADQMTVSELVQSRRQAVTR	PVLLTP	LTPFAVGVAVGAGLYAYHKWGGAEETPTGYRLDSETADQMTVSELVQSRRQAVTR	55	3	6	0	0	0	8	0	8	0.145455	7	6	6	4	0	23	0.418182
C2	MNRIELAAEKLAGSMVPLQEVTPEQPVVCTPVVTAGFAAFGIGYYVAKAFGPSEEASAEASGAGIEAMSGNDLIQFRRTEVSA	PVVCTP	CTPVVTAGFAAFGIGYYVAKAFGPSEEASAEASGAGIEAMSGNDLIQFRRTEVSA	55	5	3	1	0	1	7	0	8	0.145455	11	7	4	1	3	26	0.472727
C2	MSNVEAFANENADGVLNPLQVTTALGPVLATPAYAAYTAGAAAVFTAGLISDSVEDHHAAEVTPTGPVPAYGSVDELLGMRISSIN	PVLATP	ATPAYAAYTAGAAAVFTAGLISDSVEDHHAAEVTPTGPVPAYGSVDELLGMRISSIN	57	5	5	0	0	0	9	0	9	0.157895	12	5	5	3	3	28	0.491228
C2	MSNVEAFANQNADGVLNPLQVTSAVGPVLATPAYAGYAAGAGVVFTLGLISDAVEDHHADEVSPTGPVPSYGSVDELLGMRVASIN	PVLATP	ATPAYAGYAAGAGVVFTLGLISDAVEDHHADEVSPTGPVPSYGSVDELLGMRVASIN	57	5	3	0	0	0	7	0	7	0.122807	9	7	7	4	2	29	0.508772
C2	MSNVEAFANQHADNVLSPLEVTSAVGPVLATPAYAGYTAAAAAVFTAGLISDAVEHHGSDKVTPTGPVPNYGSVGDLLDMRVSSIN	PVLATP	ATPAYAGYTAAAAAVFTAGLISDAVEHHGSDKVTPTGPVPNYGSVGDLLDMRVSSIN	57	5	5	0	0	0	9	0	9	0.157895	10	6	6	3	2	27	0.473684
C2	MSNVEAFANQHADNVLSPLEVTSAVGPVLATPAYAGYTAAAAAVFTAGLISDAVEHHGSXKVTPTGPVPNYGSVGDLLDMRVSSIN	PVLATP	ATPAYAGYTAAAAAVFTAGLISDAVEHHGSXKVTPTGPVPNYGSVGDLLDMRVSSIN	57	5	5	0	0	0	9	0	9	0.157895	10	6	6	3	2	27	0.473684
C2	MSNVEAFANQHADNVLSPLEVTSAVGPVLATPAYAGYTAAAAAVFTAGLISDAVEHHGSDKVTPTGPVPNYGSVGDLLDMRVSSIN	PVLATP	ATPAYAGYTAAAAAVFTAGLISDAVEHHGSDKVTPTGPVPNYGSVGDLLDMRVSSIN	57	5	5	0	0	0	9	0	9	0.157895	10	6	6	3	2	27	0.473684
C2	MNGIEKAAQVAFQKTEGVLRPFERVSGNAPVLATPAAAAVVASATALYAAGNMVTDLVGQESAVKNPGINLAGRSGAELLNIRAEGLRG	PVLATP	ATPAAAAVVASATALYAAGNMVTDLVGQESAVKNPGINLAGRSGAELLNIRAEGLRG	57	3	3	0	0	0	5	0	5	0.0877193	14	7	5	6	2	34	0.596491
C2	MSNVEAFANQNVDGVLNPLQVTSAVGPVLATPAYAGYAAGAGVVFTLGLISDAVEDHHADEVSPTGPVPSYGSVDELLGMRVASIS	PVLATP	ATPAYAGYAAGAGVVFTLGLISDAVEDHHADEVSPTGPVPSYGSVDELLGMRVASIS	57	6	3	0	0	0	8	0	8	0.140351	9	7	7	4	2	29	0.508772
C2	MNRIECAAAKSTLEALEINHEIAAPVLTPVLVTVTVAGFAGGAAVGYVQCARHGCIDESGDGIRMTDIREMSVSELLQARQDAAVA	PVLTP	TPVLVTVTVAGFAGGAAVGYVQCARHGCIDESGDGIRMTDIREMSVSELLQARQDAAVA	59	3	4	2	0	2	6	0	8	0.135593	9	7	8	3	3	30	0.508475
C2	MNRIETVAQNLLPEADTTYLRPLESVEATVPTLTCPCVAGFILGVGAGYQFMQAVFNGPDAGYGAFTGVRGNFADMPVDELVATRQAAVGGLS	PTLTCP	TCPCVAGFILGVGAGYQFMQAVFNGPDAGYGAFTGVRGNFADMPVDELVATRQAAVGGLS	60	1	3	2	0	2	3	0	5	0.0833333	9	11	7	3	1	31	0.516667
C2	MNRIEETVRTLGADLGLEPLDATVVHTPVLCATLVDAAVGAGAFAARATRHAIVETPGRRAFATFDQGVLHNPRHEVNTASLHGLTDALPCGSLLGIANG	PVLCAT	CATLVDAAVGAGAFAARATRHAIVETPGRRAFATFDQGVLHNPRHEVNTASLHGLTDALPCGSLLGIANG	70	2	6	2	0	2	7	0	9	0.128571	14	8	5	7	2	36	0.514286
